# Supplementary material for: New Insights Into Mitochondrial DNA Reconstruction and Variant Detection in Ancient Samples
Source: Front Genet. 2021 Feb 18;12:619950. doi: 10.3389/fgene.2021.619950 (PMC7930628; doi:10.3389/fgene.2021.619950)
Supplement: Supplementary file 2 [file Table_1.XLSX]

## Sheet: Suppl_Table1
Sample name	Type	# raw reads prior Clip & Merge (C&M)	# reads after C&M prior mapping	# unmapped reads	% unmapped reads	# mapped reads (after Dedup)	# MT reads (after Dedup)	# reads with multiple hits	% multi-hit reads	# mt reads multiple hits	% mt reads multiple hits	# NU reads multiple hits	% NU reads multiple hits	# uniquely MT mapped reads MQ≥30	% MT reads	% endogenous mtDNA	# uniquely NU mapped reads MQ≥30	% NU reads	% endogenous nuDNA	# reads likely mapping on NumtS (sec.aln included)	% likely NumtS reads (sec.aln included)	# reads likely mapping on NumtS	% likely NumtS reads (only dedup reads)	% likely NumtS reads (all reads)	mtDNA mean per base depth	mtDNA coverage
Pol-1	SE	1681597	1628891	276974	0.170038	707681	32560	212912	0.300859	25	3.53267e-05	212887	0.300823	22263	0.0314591	0.0132392	450873	0.637113	0.268122	21633	0.0305689	9236	0.0130511	0.0054924	121.18	91.76
Pol-2	PE	3899920	1972138	230157	0.116704	1162872	325949	270289	0.232432	46	3.95572e-05	270243	0.232393	199062	0.171181	0.0510426	520745	0.447809	0.133527	172776	0.148577	116107	0.099845	0.0297716	816.82	97.73
Pol-3	PE	2433202	1280590	335403	0.261913	479879	170054	116759	0.243309	23	4.79287e-05	116736	0.243261	97389	0.202945	0.040025	170601	0.355508	0.0701138	95130	0.198237	64124	0.133625	0.0263538	369.31	96.47
Pol-4	SE	232196	219820	69248	0.315021	91801	23648	23840	0.259692	5	5.44656e-05	23835	0.259638	14951	0.162863	0.0643896	39815	0.43371	0.171472	13195	0.143735	7831	0.0853041	0.0337258	63.93	89.55
Pol-5	PE	511830	265218	105227	0.396757	100934	58374	15875	0.157281	8	7.92597e-05	15867	0.157202	35172	0.348465	0.0687181	21548	0.213486	0.0420999	28339	0.280768	20101	0.19915	0.0392728	138.76	96.66
Pol-6	PE	1928430	986539	237930	0.241176	507178	218113	95371	0.188042	23	4.5349e-05	95348	0.187997	129026	0.2544	0.0669073	170984	0.337128	0.0886649	111797	0.22043	76736	0.1513	0.039792	511.64	97.79
Pol-7	PE	1448716	766801	143379	0.186983	386430	163800	71939	0.186163	22	5.69314e-05	71917	0.186106	97046	0.251135	0.0669876	134810	0.34886	0.0930548	82635	0.213842	57695	0.149303	0.0398249	386.28	98.12
Pol-8	PE	109068	54292	39822	0.733478	2526	1226	584	0.231196	0	0	584	0.231196	639	0.252969	0.00585873	563	0.222882	0.00516192	740	0.292953	512	0.202692	0.00469432	1.88	62.77
Pol-9	PE	1191730	596228	111086	0.186315	367301	145481	76657	0.208703	18	4.90061e-05	76639	0.208654	85380	0.232452	0.0716437	127587	0.347364	0.10706	77677	0.211481	54203	0.147571	0.0454826	319.2	96.67
Pol-10	PE	946562	472907	140297	0.296669	250672	115778	45297	0.180702	29	0.000115689	45268	0.180587	68961	0.275105	0.0728542	77397	0.308758	0.0817664	59017	0.235435	41454	0.165371	0.0437943	261.09	95.58
Pol-11	SE	7700872	6495332	5327413	0.820191	894714	30759	223084	0.249336	6	6.70605e-06	223078	0.249329	18927	0.0211542	0.00245777	632400	0.706818	0.0821206	20303	0.0226922	10011	0.0111891	0.00129998	88.64	90.72
Pol-12	PE	1038582	556189	126809	0.227996	264749	122739	48837	0.184465	19	7.17661e-05	48818	0.184394	74481	0.281327	0.0717141	79443	0.300069	0.0764918	61988	0.234139	43710	0.1651	0.0420862	284.18	96.3
Pol-13	PE	2832298	1419524	253736	0.178747	790831	256512	201802	0.255177	54	6.82826e-05	201748	0.255109	157246	0.198836	0.0555189	298402	0.377327	0.105357	133381	0.168659	92277	0.116684	0.0325803	590.39	96.42
Pol-14	PE	1516308	796835	215701	0.270697	258356	137659	43729	0.169259	31	0.000119989	43698	0.169139	81789	0.316575	0.0539396	62540	0.242069	0.0412449	70298	0.272097	49157	0.190268	0.0324189	301.49	95.69
Pol-15	SE	354683	334397	152177	0.455079	97029	25943	29120	0.300116	3	3.09186e-05	29117	0.300086	16037	0.16528	0.045215	36366	0.374795	0.102531	15506	0.159808	8969	0.0924363	0.0252874	65.74	90.48
Pol-16	PE	780364	389825	197519	0.506686	117503	76855	20196	0.171876	6	5.10625e-05	20190	0.171825	42581	0.362382	0.0545656	12160	0.103487	0.0155825	42566	0.362255	29580	0.251738	0.0379054	142.82	92
Pol-17	SE	294070	283517	94898	0.334717	110757	26452	27568	0.248905	17	0.000153489	27551	0.248752	17042	0.153868	0.0579522	51535	0.465298	0.175247	14612	0.131928	8445	0.076248	0.0287177	75.55	91.16
Pol-18	SE	478545	464586	163482	0.351887	150183	27054	51623	0.343734	9	5.99269e-05	51614	0.343674	15802	0.105218	0.0330209	64896	0.432113	0.135611	17862	0.118935	9962	0.0663324	0.0208173	64.67	88.74
Pol-19	SE	26628	21079	20340	0.964941	674	141	365	0.541543	0	0	365	0.541543	80	0.118694	0.00300436	147	0.218101	0.0055205	82	0.121662	57	0.0845697	0.0021406	0.24	21.61
Pol-20	SE	16758	15006	13936	0.928695	862	132	465	0.539443	0	0	465	0.539443	68	0.0788863	0.00405776	249	0.288863	0.0148586	80	0.0928074	57	0.0661253	0.00340136	0.19	15.82
Pol-21	SE	934120	867832	586388	0.675693	140522	24783	51372	0.36558	8	5.69306e-05	51364	0.365523	13689	0.0974154	0.0146544	60155	0.428082	0.0643975	15306	0.108922	8945	0.0636555	0.00957586	56.3	89.57
Pol-22	SE	262775	250631	112030	0.446992	71620	20990	21065	0.294122	5	6.98129e-05	21060	0.294052	12171	0.169939	0.0463172	25896	0.361575	0.0985482	12488	0.174365	7685	0.107302	0.0292456	46.83	88.21
Pol-23	SE	504635	466027	169909	0.36459	163617	27896	51387	0.314069	13	7.94538e-05	51374	0.313989	17133	0.104714	0.0339513	78270	0.478373	0.155102	16827	0.102844	9623	0.0588142	0.0190692	73.45	90.14
Pol-24	PE	1728660	895820	349848	0.390534	277622	146031	65473	0.235835	35	0.000126071	65438	0.235709	85321	0.307328	0.0493567	50361	0.181401	0.029133	76467	0.275436	52684	0.189769	0.0304768	315.89	96.42
Pol-25	SE	415603	398791	193839	0.486067	105914	29178	26733	0.252403	8	7.5533e-05	26725	0.252327	18959	0.179004	0.0456181	44617	0.421257	0.107355	15605	0.147337	8645	0.0816228	0.0208011	89.86	90.59
Pol-26	PE	4985034	2513414	565463	0.224978	1227177	455126	228914	0.186537	101	8.23027e-05	228813	0.186455	282758	0.230413	0.0567214	491938	0.40087	0.098683	223567	0.18218	153876	0.12539	0.0308676	1190.13	98.38
Pol-27	PE	3495770	1738105	732273	0.421305	649715	346438	106638	0.16413	68	0.000104661	106570	0.164026	204838	0.315274	0.058596	163047	0.250952	0.0466412	175192	0.269644	120959	0.186172	0.0346015	804.09	97.93
Pol-28	PE	2207382	1103035	414162	0.375475	429963	174738	120057	0.279226	26	6.04703e-05	120031	0.279166	103979	0.241832	0.0471051	111521	0.259373	0.0505218	94406	0.219568	64921	0.150992	0.0294109	377.7	94.93
Pol-29	SE	188163	168984	90670	0.53656	57934	18262	15395	0.265733	5	8.63051e-05	15390	0.265647	11182	0.193013	0.0594272	21992	0.379604	0.116877	9365	0.161649	6095	0.105206	0.0323921	44.38	88
Pol-30	SE	6493005	5083822	1814867	0.356989	2497477	32493	713276	0.285599	15	6.00606e-06	713261	0.285593	21591	0.00864512	0.00332527	1739855	0.696645	0.267958	22755	0.0091112	9521	0.00381225	0.00146635	110.11	92.58
average all	-	1.68792e+06	1.08354e+06	442833	0.408691	412150	107839	99199.8	0.261182	20.9333	6.11067e-05	99199.8	0.261121	64852.1	0.194426	0.0439395	191357	0.367323	0.0950275	56719.8	0.177069	38105.9	0.118021	0.0257589	257.091	87.6263
median all	-	992572	576208	181874	0.315639	254514	45467	51369	0.24912	16	5.84291e-05	51369	0.24904	28717.5	0.195925	0.0501997	71146.5	0.358542	0.0908598	25547	0.171512	15056	0.111993	0.0295912	129.97	92.29
average SE	-	1.39883e+06	1.19277e+06	649012	0.544124	363628	22877.9	103435	0.325795	8.5	5.10625e-05	103435	0.325744	14278.2	0.113582	0.0304736	231933	0.451596	0.126123	13972.8	0.109026	7505.86	0.0654049	0.0166738	64.3621	79.9236
median SE	-	385143	366594	157830	0.430529	108336	26197.5	28334	0.297119	7	5.56981e-05	28334	0.297069	15919.5	0.111956	0.0334861	48076	0.430098	0.112116	15406	0.120298	8795	0.0712902	0.0199352	65.205	89.855
average PE	-	1940866	987966	262426	0.265622	454607	182180	95494.2	0.204646	31.8125	6.98954e-05	95494.2	0.204576	109104	0.265164	0.0557222	155853	0.293584	0.067819	94123.5	0.236606	64881	0.164061	0.0337084	425.729	94.3663
median PE	-	1622484	846328	222929	0.263407	376866	154916	74278	0.18729	24.5	6.43765e-05	74278	0.187226	91213	0.253684	0.0561201	119554	0.304414	0.0733028	80156	0.227284	55949	0.1582	0.0335909	344.255	96.445

## Sheet: Suppl_Table2
	mean contamination rate filtering												max contamination rate filtering
	contamination				strand bias				weak evidence				contamination				strand bias				weak evidence
Sample	FP	FDR	FN	FNR	FP	FDR	FN	FNR	FP	FDR	FN	FNR	FP	FDR	FN	FNR	FP	FDR	FN	FNR	FP	FDR	FN	FNR
Pol-1	1.48	0.02	2.74	0.03	1.48	0.02	0	0	0.48	0.01	1.93	0.02	5.72	0.07	3.61	0.05	0.56	0.01	0.32	0	0.33	0	0.96	0.01
Pol-2	0.19	0.01	0.28	0.01	0	0	0	0	0	0	0.02	0	0	0	0.63	0.02	0	0	0.63	0.02	0	0	0.63	0.02
Pol-3	2.45	0.05	1.71	0.03	0.05	0	0	0	0.23	0	1.67	0.03	1.45	0.03	3.23	0.07	0	0	0	0	0.15	0	0.41	0.01
Pol-4	10.02	0.05	3.99	0.02	0.4	0	0	0	5.87	0.03	6.02	0.03	26.55	0.14	9.91	0.06	0.34	0	0	0	1.66	0.01	2.98	0.02
Pol-5	3.9	0.05	4.36	0.05	2.6	0.03	0	0	1.63	0.02	3.88	0.05	3.46	0.05	7.68	0.11	1.41	0.02	0	0	0.32	0.01	2.58	0.04
Pol-6	1.96	0.03	1.71	0.03	0.07	0	0	0	0.21	0	1.24	0.02	0.84	0.02	2.22	0.04	0	0	0	0	0.09	0	0.58	0.01
Pol-7	0.6	0.01	0.93	0.02	0.01	0	0	0	0.17	0	0.58	0.01	1.23	0.02	1.39	0.02	0	0	0	0	0.17	0	0.24	0
Pol-9	0.43	0.01	3.42	0.06	0.02	0	0	0	0.12	0	3.15	0.06	3.73	0.08	2.08	0.04	0.02	0	0	0	0.25	0.01	1.25	0.03
Pol-10	2.32	0.06	1.47	0.04	0.22	0.01	0	0	0.39	0.01	1.17	0.03	2.75	0.09	3.43	0.11	0.03	0	0	0	0.26	0.01	0.55	0.02
Pol-11	6.58	0.03	1.54	0.01	1.63	0.01	0	0	3.89	0.02	3.55	0.02	14.87	0.08	8.56	0.04	1.44	0.01	0	0	0.85	0	3.86	0.02
Pol-12	1.57	0.03	2.67	0.05	0.05	0	0	0	0.04	0	1.97	0.03	0.98	0.02	2.82	0.06	0.03	0	0	0	0.02	0	0.85	0.02
Pol-13	0.34	0.02	1.24	0.06	0	0	0	0	0.13	0.01	0.48	0.02	0.03	0	1.33	0.07	0	0	0	0	0.04	0	0.21	0.01
Pol-14	0.72	0.03	1.36	0.06	0.04	0	0	0	0.13	0.01	0.82	0.04	1.2	0.07	1.31	0.07	0	0	0	0	0.39	0.02	0.18	0.01
Pol-15	9.61	0.05	4.02	0.02	0.76	0	0	0	5.37	0.03	7.52	0.04	23.08	0.14	11.49	0.08	0.56	0	0	0	1.07	0.01	5.5	0.04
Pol-16	8.2	0.06	3.5	0.03	2.48	0.02	0	0	4.9	0.04	4.11	0.03	10.87	0.1	7.07	0.06	1.44	0.01	0	0	1.3	0.01	2.68	0.02
Pol-17	8.43	0.05	3.3	0.02	0.6	0	0	0	5.39	0.03	7.21	0.04	17.03	0.11	12.22	0.08	0.47	0	0	0	2.21	0.01	5.47	0.03
Pol-18	13.77	0.05	0.31	0	2.54	0.01	0	0	13.64	0.04	4.65	0.02	24.73	0.1	13.69	0.06	2.12	0.01	0	0	3.21	0.01	6.55	0.03
Pol-21	32.99	0.05	0.05	0	1.53	0	0	0	27.31	0.04	1.5	0	54.58	0.09	14.16	0.02	1.23	0	0	0	14.05	0.02	3.65	0.01
Pol-22	21.7	0.07	2.09	0.01	0.56	0	0	0	16.95	0.05	8.87	0.03	41.7	0.17	21.36	0.09	0.39	0	0	0	4.85	0.02	7.13	0.03
Pol-23	8.47	0.04	3.1	0.02	2.44	0.01	0	0	3.47	0.02	6.64	0.03	18	0.11	8.94	0.06	1.61	0.01	0	0	0.52	0	2.64	0.02
Pol-24	1.63	0.04	2.28	0.06	0.12	0	0	0	0.82	0.02	2.36	0.06	2.73	0.08	2.01	0.06	0	0	0	0	0.51	0.02	0.68	0.02
Pol-25	7.35	0.03	1.96	0.01	5.57	0.02	0.82	0	2.81	0.01	2.19	0.01	21.19	0.1	4.93	0.03	5.07	0.02	0.79	0	1.74	0.01	1.66	0.01
Pol-26	0.25	0.01	0	0	0	0	0	0	0.05	0	0	0	0	0	0.74	0.02	0	0	0	0	0	0	0.46	0.01
Pol-27	0.19	0	0.62	0.01	0	0	0	0	0.01	0	0.19	0	0.93	0.02	0.3	0.01	0	0	0	0	0	0	0.11	0
Pol-28	0.24	0.01	1.54	0.09	0	0	0	0	0	0	0.22	0.01	0.27	0.02	0.72	0.05	0	0	0	0	0	0	0.06	0
Pol-29	26.39	0.07	0	0	0.65	0	0	0	23.32	0.06	5.7	0.02	48.77	0.18	23.04	0.09	0.46	0	0	0	5.84	0.02	8.66	0.04
Pol-30	4.07	0.03	2.4	0.02	2.72	0.02	1.58	0.01	1.2	0.01	2.8	0.02	6.1	0.05	4.17	0.03	1.16	0.01	1.5	0.01	0.32	0	1.65	0.01
MEAN	6.51296	0.0355556	1.94778	0.0281481	0.982963	0.00555556	0.0888889	0.00037037	4.39	0.017037	2.97926	0.0248148	12.3256	0.0718519	6.40889	0.0555556	0.679259	0.0037037	0.12	0.00111111	1.48704	0.00703704	2.30296	0.0181481

## Sheet: Suppl_Table3
	AD1									AD2									AD3									AD5									AD10
	no cont filt			mean cont filt			max cont filt			no cont filt			mean cont filt			max cont filt			no cont filt			mean cont filt			max cont filt			no cont filt			mean cont filt			max cont filt			no cont filt			mean cont filt			max cont filt
Sample	# variants shared	# variants (only Mutect2)	# variants (only schmutzi)	# variants shared	# variants (only Mutect2)	# variants (only schmutzi)	# variants shared	# variants (only Mutect2)	# variants (only schmutzi)	# variants shared	# variants (only Mutect2)	# variants (only schmutzi)	# variants shared	# variants (only Mutect2)	# variants (only schmutzi)	# variants shared	# variants (only Mutect2)	# variants (only schmutzi)	# variants shared	# variants (only Mutect2)	# variants (only schmutzi)	# variants shared	# variants (only Mutect2)	# variants (only schmutzi)	# variants shared	# variants (only Mutect2)	# variants (only schmutzi)	# variants shared	# variants (only Mutect2)	# variants (only schmutzi)	# variants shared	# variants (only Mutect2)	# variants (only schmutzi)	# variants shared	# variants (only Mutect2)	# variants (only schmutzi)	# variants shared	# variants (only Mutect2)	# variants (only schmutzi)	# variants shared	# variants (only Mutect2)	# variants (only schmutzi)	# variants shared	# variants (only Mutect2)	# variants (only schmutzi)
Pol-1	34	5	7	34	5	7	34	3	7	34	1	7	34	1	7	34	1	7	34	1	7	34	1	7	34	1	7	34	1	7	34	1	7	34	1	7	34	1	7	34	1	7	34	1	7
Pol-2	30	1	6	30	1	6	30	1	6	30	1	6	30	1	6	30	1	6	30	1	6	30	1	6	30	1	6	30	1	6	30	1	6	30	1	6	30	1	6	30	1	6	30	1	6
Pol-3	26	3	8	26	3	8	26	3	8	26	2	8	26	2	8	26	2	8	26	2	8	26	2	8	26	2	8	26	2	8	26	2	8	26	2	8	26	2	8	26	2	8	26	2	8
Pol-4	8	1	5	8	1	5	8	1	5	8	0	5	8	0	5	8	0	5	8	0	5	8	0	5	8	0	5	8	0	5	8	0	5	8	0	5	8	0	5	8	0	5	8	0	5
Pol-5	8	3	4	8	3	4	8	3	4	8	0	4	8	0	4	8	0	4	8	0	4	8	0	4	8	0	4	8	0	4	8	0	4	8	0	4	8	0	4	8	0	4	8	0	4
Pol-6	34	2	6	34	2	6	34	2	6	34	1	6	34	1	6	34	1	6	34	1	6	34	1	6	34	1	6	34	1	6	34	1	6	34	1	6	34	1	6	34	1	6	34	1	6
Pol-7	34	3	3	34	3	3	34	2	3	34	0	3	34	0	3	34	0	3	34	0	3	34	0	3	34	0	3	34	0	3	34	0	3	34	0	3	33	0	4	33	0	4	33	0	4
Pol-9	26	5	4	26	1	4	26	1	4	25	0	5	25	0	5	25	0	5	25	0	5	25	0	5	25	0	5	25	0	5	25	0	5	25	0	5	25	0	5	25	0	5	25	0	5
Pol-10	11	3	8	11	3	8	11	3	8	11	1	8	11	1	8	11	1	8	11	1	8	11	1	8	11	1	8	11	1	8	11	1	8	11	1	8	11	1	8	11	1	8	11	1	8
Pol-11	35	0	8	35	0	8	35	0	8	35	0	8	35	0	8	35	0	8	35	0	8	35	0	8	35	0	8	35	0	8	35	0	8	35	0	8	35	0	8	35	0	8	35	0	8
Pol-12	33	1	7	33	1	7	33	1	7	33	1	7	33	1	7	33	1	7	33	1	7	33	1	7	33	1	7	32	1	8	32	1	8	32	1	8	32	1	8	32	1	8	32	1	8
Pol-13	11	0	3	11	0	3	11	0	3	11	0	3	11	0	3	11	0	3	11	0	3	11	0	3	11	0	3	11	0	3	11	0	3	11	0	3	11	0	3	11	0	3	11	0	3
Pol-14	7	2	4	7	2	4	7	2	4	7	0	4	7	0	4	7	0	4	7	0	4	7	0	4	7	0	4	7	0	4	7	0	4	7	0	4	7	0	4	7	0	4	7	0	4
Pol-15	13	2	5	13	2	5	13	2	5	13	0	5	13	0	5	13	0	5	13	0	5	13	0	5	13	0	5	13	0	5	13	0	5	13	0	5	13	0	5	13	0	5	13	0	5
Pol-16	19	2	9	19	2	9	19	2	9	19	0	9	19	0	9	19	0	9	19	0	9	19	0	9	19	0	9	19	0	9	19	0	9	19	0	9	18	0	10	18	0	10	18	0	10
Pol-17	25	8	9	25	8	9	25	8	9	25	2	9	25	2	9	25	2	9	25	2	9	25	2	9	25	2	9	25	2	9	25	2	9	25	2	9	25	1	9	25	1	9	25	1	9
Pol-18	28	5	9	28	5	9	28	5	9	28	2	9	28	2	9	28	2	9	28	2	9	28	2	9	28	2	9	27	2	10	27	2	10	27	2	10	26	2	11	26	2	11	26	2	11
Pol-21	23	8	7	23	8	7	23	8	7	23	2	7	23	2	7	23	2	7	23	2	7	23	2	7	23	2	7	23	1	7	23	1	7	23	1	7	23	1	7	23	1	7	23	1	7
Pol-22	10	6	4	10	6	4	10	6	4	9	3	5	9	3	5	9	3	5	9	3	5	9	3	5	9	3	5	9	3	5	9	3	5	9	3	5	8	3	6	8	3	6	8	3	6
Pol-23	30	0	6	30	0	6	30	0	6	30	0	6	30	0	6	30	0	6	30	0	6	30	0	6	30	0	6	30	0	6	30	0	6	30	0	6	30	0	6	30	0	6	30	0	6
Pol-24	11	4	4	11	4	4	11	4	4	11	1	4	11	1	4	11	1	4	11	1	4	11	1	4	11	1	4	11	1	4	11	1	4	11	1	4	11	1	4	11	1	4	11	1	4
Pol-25	8	1	6	8	1	6	8	1	6	8	0	6	8	0	6	8	0	6	8	0	6	8	0	6	8	0	6	8	0	6	8	0	6	8	0	6	8	0	6	8	0	6	8	0	6
Pol-26	31	3	4	31	3	4	31	1	4	31	0	4	31	0	4	31	0	4	31	0	4	31	0	4	31	0	4	31	0	4	31	0	4	31	0	4	30	0	5	30	0	5	30	0	5
Pol-27	28	1	4	28	1	4	28	1	4	28	1	4	28	1	4	28	1	4	28	1	4	28	1	4	28	1	4	28	1	4	28	1	4	28	1	4	28	1	4	28	1	4	28	1	4
Pol-28	10	0	3	10	0	3	10	0	3	10	0	3	10	0	3	10	0	3	10	0	3	10	0	3	10	0	3	10	0	3	10	0	3	10	0	3	10	0	3	10	0	3	10	0	3
Pol-29	9	3	6	9	3	6	9	3	6	9	1	6	9	1	6	9	1	6	9	0	6	9	0	6	9	0	6	9	0	6	9	0	6	9	0	6	8	0	7	8	0	7	8	0	7
Pol-30	19	1	5	19	1	5	19	1	5	19	0	5	19	0	5	19	0	5	19	0	5	19	0	5	19	0	5	19	0	5	19	0	5	19	0	5	19	0	5	19	0	5	19	0	5
MEAN	20.7778	2.7037	5.7037	20.7778	2.55556	5.7037	20.7778	2.37037	5.7037	20.7037	0.703704	5.77778	20.7037	0.703704	5.77778	20.7037	0.703704	5.77778	20.7037	0.666667	5.77778	20.7037	0.666667	5.77778	20.7037	0.666667	5.77778	20.6296	0.62963	5.85185	20.6296	0.62963	5.85185	20.6296	0.62963	5.85185	20.4074	0.592593	6.07407	20.4074	0.592593	6.07407	20.4074	0.592593	6.07407
MEDIAN	23	2	6	23	2	6	23	2	6	23	0	6	23	0	6	23	0	6	23	0	6	23	0	6	23	0	6	23	0	6	23	0	6	23	0	6	23	0	6	23	0	6	23	0	6

## Sheet: Suppl_Table4
	AD1									AD2									AD3									AD5									AD10
	no cont filt			mean cont filt			max cont filt			no cont filt			mean cont filt			max cont filt			no cont filt			mean cont filt			max cont filt			no cont filt			mean cont filt			max cont filt			no cont filt			mean cont filt			max cont filt
Sample	# variants shared	# variants (only Mutect2)	# variants (only schmutzi)	# variants shared	# variants (only Mutect2)	# variants (only schmutzi)	# variants shared	# variants (only Mutect2)	# variants (only schmutzi)	# variants shared	# variants (only Mutect2)	# variants (only schmutzi)	# variants shared	# variants (only Mutect2)	# variants (only schmutzi)	# variants shared	# variants (only Mutect2)	# variants (only schmutzi)	# variants shared	# variants (only Mutect2)	# variants (only schmutzi)	# variants shared	# variants (only Mutect2)	# variants (only schmutzi)	# variants shared	# variants (only Mutect2)	# variants (only schmutzi)	# variants shared	# variants (only Mutect2)	# variants (only schmutzi)	# variants shared	# variants (only Mutect2)	# variants (only schmutzi)	# variants shared	# variants (only Mutect2)	# variants (only schmutzi)	# variants shared	# variants (only Mutect2)	# variants (only schmutzi)	# variants shared	# variants (only Mutect2)	# variants (only schmutzi)	# variants shared	# variants (only Mutect2)	# variants (only schmutzi)
Pol-1	34	63	7	34	56	7	34	46	7	34	54	7	34	52	7	34	44	7	34	52	7	34	52	7	34	44	7	34	28	7	34	28	7	34	28	7	34	2	7	34	2	7	34	2	7
Pol-2	30	5	6	30	4	6	30	2	6	30	5	6	30	4	6	30	2	6	30	4	6	30	4	6	30	2	6	30	2	6	30	2	6	30	2	6	30	2	6	30	2	6	30	2	6
Pol-3	26	36	8	26	29	8	26	19	8	26	30	8	26	28	8	26	18	8	26	22	8	26	22	8	26	18	8	26	13	8	26	13	8	26	12	8	26	10	8	26	10	8	26	10	8
Pol-4	7	263	6	7	239	6	7	197	6	8	197	5	8	196	5	8	182	5	8	163	5	8	163	5	8	163	5	8	65	5	8	65	5	8	65	5	8	2	5	8	2	5	8	2	5
Pol-5	8	106	4	8	86	4	8	59	4	8	75	4	8	69	4	8	56	4	8	59	4	8	59	4	8	55	4	8	41	4	8	41	4	8	39	4	8	15	4	8	15	4	8	15	4
Pol-6	35	29	5	35	24	5	35	18	5	35	24	5	35	23	5	35	17	5	35	17	5	35	17	5	35	17	5	35	13	5	35	13	5	35	13	5	35	7	5	35	7	5	35	7	5
Pol-7	33	27	4	33	26	4	33	23	4	33	24	4	33	23	4	33	21	4	33	20	4	33	20	4	33	20	4	33	17	4	33	17	4	33	17	4	32	6	5	32	6	5	32	6	5
Pol-9	24	35	6	24	25	6	24	24	6	23	25	7	23	24	7	23	23	7	23	22	7	23	22	7	23	21	7	24	17	6	24	17	6	24	17	6	24	5	6	24	5	6	24	5	6
Pol-10	11	35	8	11	28	8	11	19	8	11	28	8	11	26	8	11	17	8	11	22	8	11	22	8	11	15	8	11	11	8	11	11	8	11	11	8	11	4	8	11	4	8	11	4	8
Pol-11	35	224	8	35	216	8	35	175	8	35	180	8	35	180	8	35	166	8	35	146	8	35	146	8	35	145	8	35	91	8	35	91	8	35	91	8	35	3	8	35	3	8	35	3	8
Pol-12	33	28	7	33	22	7	33	15	7	33	25	7	33	22	7	33	15	7	33	20	7	33	20	7	33	15	7	32	11	8	32	11	8	32	11	8	32	6	8	32	6	8	32	6	8
Pol-13	10	13	4	10	11	4	10	6	4	11	11	3	11	9	3	11	4	3	11	9	3	11	7	3	11	4	3	11	4	3	11	4	3	11	4	3	11	2	3	11	2	3	11	2	3
Pol-14	7	17	4	7	15	4	7	12	4	7	15	4	7	13	4	7	10	4	7	12	4	7	12	4	7	10	4	7	10	4	7	10	4	7	10	4	7	2	4	7	2	4	7	2	4
Pol-15	12	241	6	12	216	6	12	159	6	12	173	6	12	172	6	12	151	6	12	133	6	12	132	6	12	132	6	13	62	5	13	62	5	13	62	5	13	2	5	13	2	5	13	2	5
Pol-16	20	150	8	20	140	8	20	114	8	20	110	8	20	110	8	20	99	8	20	81	8	20	81	8	20	81	8	20	43	8	20	43	8	20	43	8	19	12	9	19	12	9	19	12	9
Pol-17	24	234	10	24	213	10	24	150	10	24	153	10	24	152	10	24	135	10	24	127	10	24	126	10	24	125	10	24	72	10	24	72	10	24	72	10	25	2	9	25	2	9	25	2	9
Pol-18	27	350	10	28	341	9	28	252	9	27	235	10	28	232	9	28	216	9	27	195	10	28	193	9	28	191	9	27	100	10	27	99	10	27	99	10	26	2	11	26	2	11	26	2	11
Pol-21	23	731	7	23	731	7	23	666	7	23	536	7	23	536	7	23	536	7	23	435	7	23	435	7	23	435	7	23	190	7	23	190	7	23	190	7	23	9	7	23	9	7	23	9	7
Pol-22	9	450	5	9	399	5	10	266	4	9	270	5	9	270	5	9	235	5	9	192	5	9	192	5	9	191	5	9	58	5	9	58	5	9	58	5	8	3	6	8	3	6	8	3	6
Pol-23	28	207	8	28	195	8	28	151	8	29	151	7	29	151	7	29	140	7	29	120	7	29	120	7	29	120	7	29	65	7	29	65	7	29	65	7	30	0	6	30	0	6	30	0	6
Pol-24	11	36	4	11	30	4	11	24	4	11	27	4	11	27	4	11	21	4	11	25	4	11	25	4	11	21	4	11	14	4	11	14	4	11	14	4	11	7	4	11	7	4	11	7	4
Pol-25	7	241	7	7	234	7	8	218	6	7	210	7	7	210	7	8	204	6	7	182	7	7	182	7	8	181	6	8	110	6	8	110	6	8	110	6	8	8	6	8	8	6	8	8	6
Pol-26	31	5	4	31	5	4	31	2	4	31	2	4	31	2	4	31	1	4	31	2	4	31	2	4	31	1	4	31	1	4	31	1	4	31	1	4	30	1	5	30	1	5	30	1	5
Pol-27	28	33	4	28	32	4	28	32	4	28	33	4	28	32	4	28	32	4	28	30	4	28	30	4	28	30	4	28	26	4	28	26	4	28	26	4	28	24	4	28	24	4	28	24	4
Pol-28	10	10	3	10	7	3	10	5	3	10	10	3	10	7	3	10	5	3	10	10	3	10	7	3	10	5	3	10	5	3	10	5	3	10	5	3	10	2	3	10	2	3	10	2	3
Pol-29	9	494	6	9	475	6	9	295	6	9	302	6	9	301	6	9	263	6	9	218	6	9	217	6	9	213	6	9	42	6	9	42	6	9	42	6	8	0	7	8	0	7	8	0	7
Pol-30	19	139	5	19	134	5	20	123	4	19	118	5	19	118	5	20	112	4	19	108	5	19	108	5	20	107	4	20	84	4	20	84	4	20	84	4	20	18	4	20	18	4	20	18	4
MEAN	20.4074	155.63	6.07407	20.4444	145.667	6.03704	20.5556	113.778	5.92593	20.4815	111.963	6	20.5185	110.704	5.96296	20.5926	100.926	5.88889	20.4815	89.8519	6	20.5185	89.4815	5.96296	20.5926	87.4815	5.88889	20.5926	44.2593	5.88889	20.5926	44.2222	5.88889	20.5926	44.1111	5.88889	20.4444	5.77778	6.03704	20.4444	5.77778	6.03704	20.4444	5.77778	6.03704
MEDIAN	23	63	6	23	56	6	23	46	6	23	54	6	23	52	6	23	44	6	23	52	6	23	52	6	23	44	6	23	28	6	23	28	6	23	28	6	23	3	6	23	3	6	23	3	6

## Sheet: Suppl_Table5
Sample	% variants in schmutzi cons. confirmed by Mutect2	% PASS variant concordance	% PASS AF50 variant concordance	% PASS AD10 variant concordance	% PASS AF50 AD10 variant concordance	% Mutect2 variant not confirmed	% Mutect2 PASS variant not confirmed	% Mutect2 PASS AF50 variant not confirmed	% Mutect2 PASS AD10 variant not confirmed	% Mutect2 PASS AF50 AD10 variant not confirmed	% schmutzi variant non-PASS	% schmutzi variant non-PASS AF<50	% schmutzi variant non-PASS AD<10	% schmutzi variant non-PASS AF<50 AD<10
Pol-1	82.9268	82.9268	82.9268	82.9268	82.9268	98.0094	60.9195	8.10811	5.55556	2.85714	0	0	0	0
Pol-2	86.1111	83.3333	83.3333	83.3333	83.3333	98.7857	21.0526	3.22581	5.26316	3.22581	2.77778	2.77778	2.77778	2.77778
Pol-3	82.3529	76.4706	76.4706	76.4706	76.4706	98.773	40.9091	10.7143	27.7778	7.40741	5.88235	5.88235	5.88235	5.88235
Pol-4	61.5385	61.5385	61.5385	61.5385	61.5385	99.5602	96.2264	11.1111	20	0	0	0	0	0
Pol-5	75	66.6667	66.6667	66.6667	66.6667	99.5135	88.5714	27.2727	65.2174	0	8.33333	8.33333	8.33333	8.33333
Pol-6	90	85	85	87.5	85	98.6254	38.1818	5.55556	15.9091	2.85714	5	5	2.5	5
Pol-7	91.8919	91.8919	91.8919	86.4865	89.1892	98.6088	43.3333	5.55556	15	0	0	0	5.40541	2.7027
Pol-9	90	86.6667	86.6667	80	83.3333	98.7615	52.7273	3.7037	16.129	0	3.33333	3.33333	10	6.66667
Pol-10	73.6842	57.8947	57.8947	57.8947	57.8947	99.3253	66.6667	21.4286	25	8.33333	15.7895	15.7895	15.7895	15.7895
Pol-11	81.3953	81.3953	81.3953	81.3953	81.3953	98.1442	83.945	0	7.89474	0	0	0	0	0
Pol-12	90	82.5	82.5	80	80	98.1791	34	2.94118	15.3846	3.0303	7.5	7.5	10	10
Pol-13	78.5714	78.5714	78.5714	78.5714	78.5714	99.5451	47.619	0	11.1111	0	0	0	0	0
Pol-14	72.7273	63.6364	63.6364	63.6364	63.6364	99.6284	65	22.2222	22.2222	0	9.09091	9.09091	9.09091	9.09091
Pol-15	77.7778	72.2222	72.2222	72.2222	72.2222	99.2441	92.973	13.3333	13.3333	0	5.55556	5.55556	5.55556	5.55556
Pol-16	82.1429	71.4286	67.8571	67.8571	64.2857	98.8223	85.7143	9.52381	38.7097	0	10.7143	14.2857	14.2857	17.8571
Pol-17	76.4706	73.5294	73.5294	73.5294	73.5294	98.6444	85.8757	25	7.40741	3.84615	2.94118	2.94118	2.94118	2.94118
Pol-18	81.0811	75.6757	75.6757	70.2703	70.2703	98.497	90.2778	15.625	7.40741	7.40741	5.40541	5.40541	10.8108	10.8108
Pol-21	76.6667	76.6667	76.6667	76.6667	76.6667	98.8494	96.6667	25.8065	28.125	4.16667	0	0	0	0
Pol-22	71.4286	71.4286	71.4286	57.1429	57.1429	99.4869	96.4413	40	30	30	0	0	14.2857	14.2857
Pol-23	83.3333	83.3333	83.3333	83.3333	83.3333	98.4871	83.6066	0	0	0	0	0	0	0
Pol-24	73.3333	73.3333	73.3333	73.3333	73.3333	99.5277	70.2703	26.6667	38.8889	8.33333	0	0	0	0
Pol-25	57.1429	57.1429	57.1429	57.1429	57.1429	99.5692	96.4758	11.1111	50	0	0	0	0	0
Pol-26	88.5714	88.5714	88.5714	85.7143	85.7143	98.9225	8.82353	3.22581	3.125	0	0	0	2.85714	2.85714
Pol-27	90.625	87.5	87.5	87.5	87.5	98.8311	55.5556	3.44828	43.6364	3.44828	3.125	3.125	3.125	3.125
Pol-28	76.9231	76.9231	76.9231	76.9231	76.9231	99.5536	41.1765	0	16.6667	0	0	0	0	0
Pol-29	60	60	60	53.3333	53.3333	99.5082	97.0684	25	0	0	0	0	6.66667	6.66667
Pol-30	83.3333	83.3333	79.1667	83.3333	79.1667	98.887	86.1111	5	47.3684	0	0	4.16667	0	4.16667
MEAN	79.0752	75.9104	75.6238	74.249	74.0933	98.9737	67.6366	12.0585	21.3753	3.14492	3.16476	3.45136	4.82619	4.98182
MAX	91.8919	91.8919	91.8919	87.5	89.1892	99.6284	97.0684	40	65.2174	30	15.7895	15.7895	15.7895	17.8571
MIN	57.1429	57.1429	57.1429	53.3333	53.3333	98.0094	8.82353	0	0	0	0	0	0	0

## Sheet: Suppl_Table6
Sample name	# variant sites	# SNPs	# MNPs	# indels	Ts/Tv (schmutzi cons. seq.)	Ts/Tv	A>C	A>G	A>T	C>A	C>G	C>T	G>A	G>C	G>T	T>A	T>C	T>G
Pol-1	36	34	0	2	19	16	0	11	0	2	0	6	10	0	0	0	5	0
Pol-2	38	30	4	3	34	29	0	12	0	1	0	3	9	0	0	0	5	0
Pol-3	36	33	1	2	32	32	0	9	0	1	0	8	9	0	0	0	6	0
Pol-4	10	9	0	1	-	-	0	5	0	0	0	1	1	0	0	0	2	0
Pol-5	23	23	0	0	9	22	0	4	0	0	0	7	8	1	0	0	3	0
Pol-6	44	40	1	3	38	39	0	12	0	1	0	6	15	0	0	0	6	0
Pol-7	40	38	1	0	-	-	0	12	0	0	0	5	7	0	0	0	14	0
Pol-9	31	27	0	4	27	26	1	10	0	0	0	6	4	0	0	0	6	0
Pol-10	16	13	0	2	16	12	0	6	1	0	0	3	3	0	0	0	0	0
Pol-11	38	36	0	2	40	35	0	11	0	1	0	7	10	0	0	0	7	0
Pol-12	39	36	0	3	37	35	0	13	0	1	0	8	8	0	0	0	6	0
Pol-13	18	12	2	2	-	-	0	4	0	0	0	1	2	0	0	0	5	0
Pol-14	9	9	0	0	-	-	0	4	0	0	0	2	2	0	0	0	1	0
Pol-15	15	14	0	1	-	-	0	5	0	0	0	3	4	0	0	0	2	0
Pol-16	31	30	0	1	-	-	0	8	0	0	0	10	7	0	0	0	5	0
Pol-17	27	25	0	2	15	24	1	9	0	0	0	5	5	0	0	0	5	0
Pol-18	27	25	0	2	34	24	0	12	0	1	0	2	6	0	0	0	4	0
Pol-21	32	30	0	2	13	29	1	10	0	0	0	3	11	0	0	0	5	0
Pol-22	10	8	0	2	-	-	0	5	0	0	0	1	0	0	0	0	2	0
Pol-23	30	29	0	1	16	28	0	12	0	1	0	4	4	0	0	0	8	0
Pol-24	18	17	0	1	-	-	0	6	0	0	0	2	8	0	0	0	1	0
Pol-25	16	15	0	1	5	14	0	5	1	0	0	3	5	0	0	0	1	0
Pol-26	32	28	2	2	30	27	0	14	0	0	0	6	5	0	0	1	2	0
Pol-27	55	50	2	2	-	-	0	12	0	0	0	4	24	0	0	0	10	0
Pol-28	12	11	0	1	-	-	0	5	0	0	0	2	1	0	0	0	3	0
Pol-29	8	7	0	1	12	-	0	4	0	0	0	1	0	0	0	0	2	0
Pol-30	38	37	0	1	-	-	0	10	0	0	0	9	8	0	0	0	10	0
MEAN	27	24.6667	0.481481	1.62963		26.1333	0.111111	8.51852	0.0740741	0.333333	0	4.37037	6.51852	0.037037	0	0.037037	4.66667	0

## Sheet: Suppl_Table7
Position	Reference	Alternate	Mutation (HGVS)	Ancestral allele	N. samples	N. samples RD10	N. samples AF50	Locus	Ensembl_Gene	Ensembl_Transcript	cDNA_position	AA_change	tRNA_annotations	Consequence	Impact	dbSNP	Mitomap_Disease	Mitomap_homoplasmy	Mitomap_heteroplasmy	AF_1KG_WES	1KG_WES_homoplasmy	1KG_WES_heteroplasmy	AF_meta	AF_WGS	AF_MSeqDR	AF_Mitomap	AF_HmtDB_healthy	AF_HmtDB_patients	HmtDB_NtVar_healthy	HmtDB_NtVar_patients	HmtDB_AaVar_healthy	HmtDB_AaVar_patients	GERP++_RS	phyloP100way_vertebrate	phastCons100way_vertebrate	SIFT	Polyphen2HumDiv	Polyphen2HumVar	DEOGEN2	FATHMM	MutationAssessor	MutationTaster	MutationTaster_model	PROVEAN	Condel	MutPred	PANTHER	PhD-SNP	SNPs&GO
71	G	A	m.71G>A	-	1	0	1	MT-DLOOP	.	.	.	.	.	intergenic_variant	MODIFIER	.	.	.	.	.	.	.	0.0002	0.0002	.	0.0001	9.5109e-05	0.000219539	0.000417	0.000397	.	.	0	1.01331	0.0629921	.	.	.	.	.	.	.	.	.	.	.	.	.	.
73	A	G	m.73A>G	+	16	9	16	MT-DLOOP	.	.	.	.	.	intergenic_variant	MODIFIER	rs869183622	.	.	.	.	.	.	0.5924	0.6468	0.4641	0.7604	0.728725	0.694621	0.693878	0.48675	.	.	0	-1.3362	0.0551181	.	.	.	.	.	.	.	.	.	.	.	.	.	.
125	T	C	m.125T>C	-	1	0	1	MT-DLOOP	.	.	.	.	.	intergenic_variant	MODIFIER	rs144402189	.	.	.	0.0012	+	-	0.0012	0.0013	0.0007	0.0033	0.0029246	0.00131723	0.012617	0.002683	.	.	0	-0.794008	0	.	.	.	.	.	.	.	.	.	.	.	.	.	.
127	T	C	m.127T>C	-	1	0	1	MT-DLOOP	.	.	.	.	.	intergenic_variant	MODIFIER	rs1556422377	.	.	.	.	.	.	0.0013	0.0014	.	0.0035	0.00320993	0.00153677	0.012579	0.002637	.	.	0	-1.15547	0	.	.	.	.	.	.	.	.	.	.	.	.	.	.
143	G	A	m.143G>A	-	1	0	1	MT-DLOOP	.	.	.	.	.	intergenic_variant	MODIFIER	rs375589100	.	.	.	0.0364	+	+	0.0132	0.0142	0.0085	0.0192	0.0201156	0.00944018	0.070547	0.022634	.	.	0	-0.613276	0	.	.	.	.	.	.	.	.	.	.	.	.	.	.
146	T	C	m.146T>C	+	4	0	4	MT-DLOOP	.	.	.	.	.	intergenic_variant	MODIFIER	rs370482130	Absence of Endometriosis	+	.	.	.	.	0.1339	0.1445	0.0971	0.1946	0.203985	0.100549	0.606967	0.206743	.	.	0	-2.23987	0	.	.	.	.	.	.	.	.	.	.	.	.	.	.
150	C	T	m.150C>T	-	5	1	4	MT-DLOOP	.	.	.	.	.	intergenic_variant	MODIFIER	rs62581312	Longevity / Cervical Carcinoma / HPV infection risk	+	+	0.1612	+	+	0.1103	0.1106	0.0658	0.134	0.12747	0.127333	0.423989	0.251077	.	.	0	-4.04719	0	.	.	.	.	.	.	.	.	.	.	.	.	.	.
151	C	T	m.151C>T	-	2	0	2	MT-DLOOP	.	.	.	.	.	intergenic_variant	MODIFIER	rs879131641	.	.	.	.	.	.	0.0179	0.0197	0.0033	0.0336	0.034263	0.0245884	0.112007	0.049736	.	.	0	-1.51694	0	.	.	.	.	.	.	.	.	.	.	.	.	.	.
152	T	C	m.152T>C	+	3	1	3	MT-DLOOP	.	.	.	.	.	intergenic_variant	MODIFIER	rs117135796	.	.	.	.	.	.	0.2203	0.2387	0.1669	0.2647	0.266305	0.227442	0.710753	0.392746	.	.	0	-1.8784	0	.	.	.	.	.	.	.	.	.	.	.	.	.	.
183	A	G	m.183A>G	-	1	1	1	MT-DLOOP	.	.	.	.	.	intergenic_variant	MODIFIER	rs113913230	.	.	.	0.0078	+	+	0.005	0.0053	0.0013	0.0056	0.00530233	0.0039517	0.021214	0.010426	.	.	0	-0.251811	0	.	.	.	.	.	.	.	.	.	.	.	.	.	.
185	G	A	m.185G>A	-	1	0	1	MT-DLOOP	.	.	.	.	.	intergenic_variant	MODIFIER	rs879015046	.	.	.	0.0256	+	+	0.0472	0.0512	0.0352	0.0391	0.0391136	0.0434687	0.162199	0.098877	.	.	0	-0.794008	0	.	.	.	.	.	.	.	.	.	.	.	.	.	.
195	T	C	m.195T>C	+	5	2	5	MT-DLOOP	.	.	.	.	.	intergenic_variant	MODIFIER	rs2857291	BD-associated / melanoma pts	+	.	.	.	.	0.1822	0.1826	0.1708	0.1957	0.200109	0.152799	0.580496	0.300672	.	.	0	0.109654	0	.	.	.	.	.	.	.	.	.	.	.	.	.	.
200	A	G	m.200A>G	-	1	1	1	MT-DLOOP	.	.	.	.	.	intergenic_variant	MODIFIER	rs372099630	.	.	.	0.0319	+	+	0.0173	0.0186	0.0156	0.0297	0.0325035	0.0188804	0.116205	0.043663	.	.	0	1.01331	0	.	.	.	.	.	.	.	.	.	.	.	.	.	.
214	A	G	m.214A>G	-	1	0	1	MT-DLOOP	.	.	.	.	.	intergenic_variant	MODIFIER	rs878957026	.	.	.	0.0066	+	+	0.0057	0.0062	0.0013	0.003	0.00285327	0.00351262	0.014407	0.008917	.	.	0	0.109654	0.283465	.	.	.	.	.	.	.	.	.	.	.	.	.	.
215	A	G	m.215A>G	-	1	0	1	MT-DLOOP	.	.	.	.	.	intergenic_variant	MODIFIER	rs879219259	.	.	.	0.0062	+	+	0.014	0.0152	0.0176	0.0092	0.00865492	0.00965971	0.032192	0.018302	.	.	0	0.832583	0.299213	.	.	.	.	.	.	.	.	.	.	.	.	.	.
228	G	A	m.228G>A	-	1	0	1	MT-DLOOP	.	.	.	.	.	intergenic_variant	MODIFIER	rs41323649	.	.	.	0.0124	+	+	0.0407	0.0439	0.0293	0.0253	0.0249186	0.0298573	0.105295	0.069383	.	.	0	-0.432543	0.00787402	.	.	.	.	.	.	.	.	.	.	.	.	.	.
253	C	T	m.253C>T	-	1	1	0	MT-DLOOP	.	.	.	.	.	intergenic_variant	MODIFIER	.	.	.	.	.	.	.	0	0	.	0.0001	9.5109e-05	0	0.000576	0.001025	.	.	0	-0.613276	0.00787402	.	.	.	.	.	.	.	.	.	.	.	.	.	.
263	A	G	m.263A>G	+	27	5	27	MT-DLOOP	.	.	.	.	.	intergenic_variant	MODIFIER	rs2853515	.	.	.	.	.	.	0.9718	0.9745	0.824	0.9484	0.910431	0.953897	0.063282	0.074704	.	.	0	0.109654	0	.	.	.	.	.	.	.	.	.	.	.	.	.	.
275	G	A	m.275G>A	-	1	1	0	MT-DLOOP	.	.	.	.	.	intergenic_variant	MODIFIER	.	.	.	.	.	.	.	0.0001	0.0001	.	0.0002	7.13318e-05	0	0.000329	0.000707	.	.	0	-1.51694	0	.	.	.	.	.	.	.	.	.	.	.	.	.	.
279	T	C	m.279T>C	-	2	0	2	MT-DLOOP	.	.	.	.	.	intergenic_variant	MODIFIER	rs879199276	.	.	.	.	.	.	0.0041	0.0044	0.0013	0.0049	0.00466034	0.00329308	0.017974	0.006754	.	.	0	-1.3362	0	.	.	.	.	.	.	.	.	.	.	.	.	.	.
302	A	ACC	m.302_303insCC	-	2	0	2	MT-DLOOP	.	.	.	.	.	intergenic_variant	MODIFIER	rs878871521	Higher in melanoma patient group	.	.	0.0334	-	+	0.0694	0.0771	0.0052	0.0033	8.81382e-05	1.61943e-05	1e-06	0	.	.	-1.12	0.109654	0	.	.	.	.	.	.	.	.	.	.	.	.	.	.
302	A	AC	m.302_303insC	-	6	4	5	MT-DLOOP	.	.	.	.	.	intergenic_variant	MODIFIER	.	.	.	.	.	.	.	0.207	0.2328	0.0222	0.0033	.	.	.	.	.	.	-1.12	0.109654	0	.	.	.	.	.	.	.	.	.	.	.	.	.	.
303	C	T	m.303C>T	-	3	3	0	MT-DLOOP	.	.	.	.	.	intergenic_variant	MODIFIER	.	.	.	.	.	.	.	0	0	.	0	4.75545e-05	0	0.001137	0	.	.	0.661	-0.794008	0	.	.	.	.	.	.	.	.	.	.	.	.	.	.
305	C	T	m.305C>T	-	1	1	0	MT-DLOOP	.	.	.	.	.	intergenic_variant	MODIFIER	.	.	.	.	.	.	.	0.0001	0.0001	.	0.0001	.	.	.	.	.	.	0.661	0.832583	0.023622	.	.	.	.	.	.	.	.	.	.	.	.	.	.
306	C	T	m.306C>T	-	1	1	0	MT-DLOOP	.	.	.	.	.	intergenic_variant	MODIFIER	.	.	.	.	.	.	.	0.0001	0.0001	.	0.0001	.	.	.	.	.	.	-0.872	0.290386	0.023622	.	.	.	.	.	.	.	.	.	.	.	.	.	.
307	C	T	m.307C>T	-	1	1	0	MT-DLOOP	.	.	.	.	.	intergenic_variant	MODIFIER	.	.	.	.	.	.	.	0.0002	0.0002	.	0.0003	4.75545e-05	0	0.000185	0.001128	.	.	0.661	1.91698	0.0314961	.	.	.	.	.	.	.	.	.	.	.	.	.	.
309	C	CCT	m.309_310insCT	-	3	3	0	MT-DLOOP	.	.	.	.	.	intergenic_variant	MODIFIER	.	.	.	.	.	.	.	0.2666	0.2666	.	0.2639	.	.	.	.	.	.	0	-0.613276	0.015748	.	.	.	.	.	.	.	.	.	.	.	.	.	.
310	T	TC	m.310_311insC	-	18	10	17	MT-DLOOP	.	.	.	.	.	intergenic_variant	MODIFIER	rs369786048	Melanoma patients	.	.	0.1686	-	+	0.5855	0.5845	0.7425	0	0.0893549	0.743798	0	0	.	.	0	-0.0710787	0.0472441	.	.	.	.	.	.	.	.	.	.	.	.	.	.
311	C	CT	m.311_312insT	-	2	2	0	MT-DLOOP	.	.	.	.	.	intergenic_variant	MODIFIER	.	.	.	.	.	.	.	0	0	.	0.0001	.	.	.	.	.	.	0	1.19405	0.0866142	.	.	.	.	.	.	.	.	.	.	.	.	.	.
312	C	CT	m.312_313insT	-	1	1	0	MT-DLOOP	.	.	.	.	.	intergenic_variant	MODIFIER	.	.	.	.	.	.	.	0	0	.	0	.	.	.	.	.	.	0	1.19405	0.0944882	.	.	.	.	.	.	.	.	.	.	.	.	.	.
319	T	C	m.319T>C	-	1	1	1	MT-DLOOP	.	.	.	.	.	intergenic_variant	MODIFIER	rs879055956	.	.	.	.	.	.	0.0162	0.0179	.	0.004	0.00427991	0.00592755	0.014161	0.006405	.	.	0	-0.251811	0	.	.	.	.	.	.	.	.	.	.	.	.	.	.
375	C	T	m.375C>T	-	1	0	1	MT-DLOOP	.	.	.	.	.	intergenic_variant	MODIFIER	.	.	.	.	.	.	.	0.0002	0.0002	.	0.0003	0.000404213	0	0.001972	0.000869	.	.	0	-0.97474	0	.	.	.	.	.	.	.	.	.	.	.	.	.	.
404	C	T	m.404C>T	-	1	1	0	MT-DLOOP	.	.	.	.	.	intergenic_variant	MODIFIER	.	.	.	.	.	.	.	0	0	.	0	2.37773e-05	0	2.2e-05	0	.	.	0	-1.3362	0	.	.	.	.	.	.	.	.	.	.	.	.	.	.
429	G	A	m.429G>A	-	2	2	0	MT-DLOOP	.	.	.	.	.	intergenic_variant	MODIFIER	.	.	.	.	.	.	.	0	0	.	0	0	0	0.000122	0	.	.	0.499	0.109654	0	.	.	.	.	.	.	.	.	.	.	.	.	.	.
462	C	T	m.462C>T	-	1	0	1	MT-DLOOP	.	.	.	.	.	intergenic_variant	MODIFIER	rs41402146	.	.	.	0.0188	+	+	0.0536	0.0584	0.0613	0.034	0.034049	0.0371021	0.126499	0.001965	.	.	0	-0.97474	0	.	.	.	.	.	.	.	.	.	.	.	.	.	.
471	T	C	m.471T>C	-	1	1	1	MT-DLOOP	.	.	.	.	.	intergenic_variant	MODIFIER	.	.	.	.	.	.	.	0.0011	0.0011	.	0.0018	0.00171196	0.00109769	0.005902	0	.	.	0	-0.794008	0	.	.	.	.	.	.	.	.	.	.	.	.	.	.
489	T	C	m.489T>C	-	2	2	2	MT-DLOOP	.	.	.	.	.	intergenic_variant	MODIFIER	rs28625645	.	.	.	0.2224	+	+	0.1549	0.1681	0.1434	0.2573	0.234396	0.284742	0.63506	0	.	.	0	-1.51694	0	.	.	.	.	.	.	.	.	.	.	.	.	.	.
497	C	T	m.497C>T	-	2	0	2	MT-DLOOP	.	.	.	.	.	intergenic_variant	MODIFIER	rs28660704	.	.	.	0.0086	+	+	0.0353	0.0385	0.0417	0.021	0.0213758	0.0155873	0.07877	0	.	.	0	-1.8784	0	.	.	.	.	.	.	.	.	.	.	.	.	.	.
513	G	A	m.513G>A	-	1	0	1	MT-DLOOP	.	.	.	.	.	intergenic_variant	MODIFIER	rs879162984	.	.	.	.	.	.	0.0114	0.0123	0.0241	0.011	0.0133866	0.0109769	0.052693	0.001202	.	.	0	-2.4206	0	.	.	.	.	.	.	.	.	.	.	.	.	.	.
513	GCA	G	m.514_515delCA	-	4	0	4	MT-DLOOP	.	.	.	.	.	intergenic_variant	MODIFIER	.	.	.	.	.	.	.	0.1615	0.173	.	0.2417	.	.	0.052693	0.001202	.	.	0	-1.15547	0	.	.	.	.	.	.	.	.	.	.	.	.	.	.
513	G	GCACA	m.513_514insCACA	-	1	0	0	MT-DLOOP	.	.	.	.	.	intergenic_variant	MODIFIER	.	.	.	.	.	.	.	0.0099	0.0109	0.0052	0.0088	.	.	0.052693	0.001202	.	.	0	-1.15547	0	.	.	.	.	.	.	.	.	.	.	.	.	.	.
653	G	A	m.653G>A	-	1	1	0	MT-RNR1	ENSG00000211459	ENST00000389680.2	6	.	.	non_coding_transcript_exon_variant	MODIFIER	.	.	.	.	.	.	.	0	0	.	.	.	.	.	.	.	.	4.01	4.98943	1	.	.	.	.	.	.	.	.	.	.	.	.	.	.
702	C	T	m.702C>T	-	1	1	0	MT-RNR1	ENSG00000211459	ENST00000389680.2	55	.	.	non_coding_transcript_exon_variant	MODIFIER	.	.	.	.	.	.	.	0.0001	0.0001	.	0.0002	0.000142663	0.000439078	0.000816	0	.	.	-8.02	-0.794008	0	.	.	.	.	.	.	.	.	.	.	.	.	.	.
709	G	A	m.709G>A	-	5	0	5	MT-RNR1	ENSG00000211459	ENST00000389680.2	62	.	.	non_coding_transcript_exon_variant	MODIFIER	rs2853517	.	.	.	0.2211	+	+	0.1324	0.1445	0.1356	0.1293	0.124426	0.14775	0.484885	0	.	.	-8.02	-3.86646	0	.	.	.	.	.	.	.	.	.	.	.	.	.	.
750	A	G	m.750A>G	+	27	15	27	MT-RNR1	ENSG00000211459	ENST00000389680.2	103	.	.	non_coding_transcript_exon_variant	MODIFIER	rs2853518	.	.	.	.	.	.	0.975	0.9773	0.8866	0.9828	0.924602	0.968825	0.049721	0	.	.	1.58	6.79675	1	.	.	.	.	.	.	.	.	.	.	.	.	.	.
867	C	T	m.867C>T	-	1	0	1	MT-RNR1	ENSG00000211459	ENST00000389680.2	220	.	.	non_coding_transcript_exon_variant	MODIFIER	.	.	.	.	.	.	.	0.0001	0.0001	.	0.0002	0.000237773	0	0.000874	0.000679	.	.	-9	-3.68572	0	.	.	.	.	.	.	.	.	.	.	.	.	.	.
930	G	A	m.930G>A	-	3	0	3	MT-RNR1	ENSG00000211459	ENST00000389680.2	283	.	.	non_coding_transcript_exon_variant	MODIFIER	rs41352944	.	.	.	0.0131	+	+	0.0345	0.0376	0.0372	0.0202	0.0196162	0.0212953	0.093907	0	.	.	-9	-6.75817	0	.	.	.	.	.	.	.	.	.	.	.	.	.	.
1004	G	A	m.1004G>A	-	1	1	0	MT-RNR1	ENSG00000211459	ENST00000389680.2	357	.	.	non_coding_transcript_exon_variant	MODIFIER	.	.	.	.	.	.	.	.	.	.	.	.	.	.	.	.	.	1.7	-0.0710787	0	.	.	.	.	.	.	.	.	.	.	.	.	.	.
1028	G	A	m.1028G>A	-	1	1	0	MT-RNR1	ENSG00000211459	ENST00000389680.2	381	.	.	non_coding_transcript_exon_variant	MODIFIER	.	.	.	.	.	.	.	.	.	.	.	.	.	.	.	.	.	2.79	2.77954	1	.	.	.	.	.	.	.	.	.	.	.	.	.	.
1189	T	C	m.1189T>C	-	1	0	1	MT-RNR1	ENSG00000211459	ENST00000389680.2	542	.	.	non_coding_transcript_exon_variant	MODIFIER	rs28358571	.	.	.	0.0111	+	+	0.0482	0.0526	0.0365	0.0315	0.0325035	0.0250274	0.129321	0	.	.	-1.98	-0.667961	0.15748	.	.	.	.	.	.	.	.	.	.	.	.	.	.
1438	A	G	m.1438A>G	+	27	5	27	MT-RNR1	ENSG00000211459	ENST00000389680.2	791	.	.	non_coding_transcript_exon_variant	MODIFIER	rs2001030	.	.	.	.	.	.	0.9624	0.9655	0.7425	0.9481	0.893335	0.938749	0.132004	0	.	.	1.91	0.0981496	0	.	.	.	.	.	.	.	.	.	.	.	.	.	.
1631	C	T	m.1631C>T	-	1	1	0	MT-TV	ENSG00000210077	ENST00000387342.1	30	.	32;II;CL;C;N	non_coding_transcript_exon_variant	MODIFIER	.	.	.	.	.	.	.	0	.	.	.	0	0	0	0	.	.	2.46	1.8219	0.992126	.	.	.	.	.	.	.	.	.	.	.	.	.	.
1652	C	T	m.1652C>T	-	2	2	0	MT-TV	ENSG00000210077	ENST00000387342.1	51	.	54;II;TL;C;N	non_coding_transcript_exon_variant	MODIFIER	.	.	.	.	.	.	.	0	0	.	.	0	0	0.000445	0	.	.	-1.03	-3.92393	0	.	.	.	.	.	.	.	.	.	.	.	.	.	.
1657	C	T	m.1657C>T	-	1	1	0	MT-TV	ENSG00000210077	ENST00000387342.1	56	.	59;II;TL;C;N	non_coding_transcript_exon_variant	MODIFIER	.	.	.	.	.	.	.	0.0002	0.0002	.	0.0001	7.13318e-05	0	0.000312	0.000686	.	.	-8.05	-1.81713	0	.	.	.	.	.	.	.	.	.	.	.	.	.	.
1677	C	T	m.1677C>T	-	1	1	0	MT-RNR2	ENSG00000210082	ENST00000387347.2	7	.	.	non_coding_transcript_exon_variant	MODIFIER	.	.	.	.	.	.	.	0.0004	0.0004	0.0007	0.0015	0.00173574	0	0.005546	0	.	.	-8.9	-4.30698	0	.	.	.	.	.	.	.	.	.	.	.	.	.	.
1782	G	A	m.1782G>A	-	2	2	0	MT-RNR2	ENSG00000210082	ENST00000387347.2	112	.	.	non_coding_transcript_exon_variant	MODIFIER	.	.	.	.	.	.	.	0	0	.	.	.	.	.	.	.	.	4.58	9.483	1	.	.	.	.	.	.	.	.	.	.	.	.	.	.
1811	A	G	m.1811A>G	-	4	2	4	MT-RNR2	ENSG00000210082	ENST00000387347.2	141	.	.	non_coding_transcript_exon_variant	MODIFIER	rs28358576	.	.	.	0.0366	+	+	0.0997	0.1086	0.0821	0.0765	0.0775852	0.0731065	0.300177	0	.	.	-1.42	-2.96629	0	.	.	.	.	.	.	.	.	.	.	.	.	.	.
1888	G	A	m.1888G>A	-	2	0	2	MT-RNR2	ENSG00000210082	ENST00000387347.2	218	.	.	non_coding_transcript_exon_variant	MODIFIER	rs2897260	.	.	.	0.0344	+	+	0.0773	0.0844	0.0619	0.0553	0.0538317	0.0603732	0.187304	0	.	.	3.21	-0.093378	0	.	.	.	.	.	.	.	.	.	.	.	.	.	.
1916	G	A	m.1916G>A	-	1	1	0	MT-RNR2	ENSG00000210082	ENST00000387347.2	246	.	.	non_coding_transcript_exon_variant	MODIFIER	.	.	.	.	.	.	.	.	.	.	.	.	.	.	.	.	.	4.58	6.22703	1	.	.	.	.	.	.	.	.	.	.	.	.	.	.
2217	C	T	m.2217C>T	-	1	0	1	MT-RNR2	ENSG00000210082	ENST00000387347.2	547	.	.	non_coding_transcript_exon_variant	MODIFIER	rs879120963	.	.	.	.	.	.	0.0031	0.0034	0.0013	0.0017	0.00161685	0.00153677	0.006318	0	.	.	-7.6	-6.60102	0	.	.	.	.	.	.	.	.	.	.	.	.	.	.
2224	C	T	m.2224C>T	-	1	1	0	MT-RNR2	ENSG00000210082	ENST00000387347.2	554	.	.	non_coding_transcript_exon_variant	MODIFIER	.	.	.	.	.	.	.	0	0	.	0	.	.	.	.	.	.	-7.02	-7.38999	0	.	.	.	.	.	.	.	.	.	.	.	.	.	.
2226	T	C	m.2226T>C	-	1	0	1	MT-RNR2	ENSG00000210082	ENST00000387347.2	556	.	.	non_coding_transcript_exon_variant	MODIFIER	.	.	.	.	.	.	.	0.0002	0.0002	.	0.0004	0.000237773	0.000878156	0.0009	0.000225	.	.	-7.83	-6.00928	0	.	.	.	.	.	.	.	.	.	.	.	.	.	.
2249	G	A	m.2249G>A	-	1	1	0	MT-RNR2	ENSG00000210082	ENST00000387347.2	579	.	.	non_coding_transcript_exon_variant	MODIFIER	.	.	.	.	.	.	.	.	.	.	.	.	.	.	.	.	.	-8.29	-7.98172	0	.	.	.	.	.	.	.	.	.	.	.	.	.	.
2294	A	G	m.2294A>G	-	1	1	1	MT-RNR2	ENSG00000210082	ENST00000387347.2	624	.	.	non_coding_transcript_exon_variant	MODIFIER	rs878904612	.	.	.	.	.	.	0.0041	0.0044	0.0059	0.0028	0.00249661	0.00285401	0.010226	0	.	.	-0.821	-1.66991	0	.	.	.	.	.	.	.	.	.	.	.	.	.	.
2345	G	A	m.2345G>A	-	1	1	0	MT-RNR2	ENSG00000210082	ENST00000387347.2	675	.	.	non_coding_transcript_exon_variant	MODIFIER	.	.	.	.	.	.	.	0	0	.	0	.	.	.	.	.	.	-2.19	-0.289205	0	.	.	.	.	.	.	.	.	.	.	.	.	.	.
2514	C	T	m.2514C>T	-	1	1	0	MT-RNR2	ENSG00000210082	ENST00000387347.2	844	.	.	non_coding_transcript_exon_variant	MODIFIER	.	.	.	.	.	.	.	.	.	.	.	.	.	.	.	.	.	4.47	5.62812	1	.	.	.	.	.	.	.	.	.	.	.	.	.	.
2592	G	A	m.2592G>A	-	1	1	0	MT-RNR2	ENSG00000210082	ENST00000387347.2	922	.	.	non_coding_transcript_exon_variant	MODIFIER	.	.	.	.	.	.	.	.	.	.	.	.	.	.	.	.	.	4.47	7.60056	1	.	.	.	.	.	.	.	.	.	.	.	.	.	.
2593	G	A	m.2593G>A	-	1	1	0	MT-RNR2	ENSG00000210082	ENST00000387347.2	923	.	.	non_coding_transcript_exon_variant	MODIFIER	.	.	.	.	.	.	.	0	0	.	.	.	.	.	.	.	.	4.47	9.37576	1	.	.	.	.	.	.	.	.	.	.	.	.	.	.
2626	T	C	m.2626T>C	-	1	1	0	MT-RNR2	ENSG00000210082	ENST00000387347.2	956	.	.	non_coding_transcript_exon_variant	MODIFIER	rs879158835	.	.	.	.	.	.	0.0041	0.0045	0.0007	0.0044	0.00385192	0.0105379	0.017364	5.4e-05	.	.	-8.95	-2.0644	0	.	.	.	.	.	.	.	.	.	.	.	.	.	.
2706	A	G	m.2706A>G	+	18	7	18	MT-RNR2	ENSG00000210082	ENST00000387347.2	1036	.	.	non_coding_transcript_exon_variant	MODIFIER	rs2854128	.	.	.	.	.	.	0.6064	0.6693	0.6291	0.7904	0.74682	0.70472	0.664014	0	.	.	-7.91	-0.0919606	0	.	.	.	.	.	.	.	.	.	.	.	.	.	.
2772	C	T	m.2772C>T	-	1	0	1	MT-RNR2	ENSG00000210082	ENST00000387347.2	1102	.	.	non_coding_transcript_exon_variant	MODIFIER	rs200221487	.	.	.	0.0045	+	+	0.0033	0.0036	.	0.0035	0.00266305	0.0107574	0.012858	0	.	.	-8.69	-8.57346	0	.	.	.	.	.	.	.	.	.	.	.	.	.	.
2831	G	A	m.2831G>A	-	1	1	0	MT-RNR2	ENSG00000210082	ENST00000387347.2	1161	.	.	non_coding_transcript_exon_variant	MODIFIER	rs199713564	.	.	.	0.0049	+	+	0.0016	0.0016	.	0.0019	0.00137908	0.00636663	0.021955	0	.	.	-8.81	-1.47267	0	.	.	.	.	.	.	.	.	.	.	.	.	.	.
2900	C	T	m.2900C>T	-	1	1	0	MT-RNR2	ENSG00000210082	ENST00000387347.2	1230	.	.	non_coding_transcript_exon_variant	MODIFIER	.	.	.	.	.	.	.	.	.	.	.	.	.	.	.	.	.	4.23	5.62812	1	.	.	.	.	.	.	.	.	.	.	.	.	.	.
3010	G	A	m.3010G>A	-	4	0	4	MT-RNR2	ENSG00000210082	ENST00000387347.2	1340	.	.	non_coding_transcript_exon_variant	MODIFIER	rs3928306	Cyclic Vomiting Syndrome with Migraine	+	.	0.1043	+	+	0.1811	0.1975	0.1617	0.144	0.137647	0.204391	0.612316	0	.	.	-0.409	2.8667	0.992126	.	.	.	.	.	.	.	.	.	.	.	.	.	.
3173	G	A	m.3173G>A	-	1	1	0	MT-RNR2	ENSG00000210082	ENST00000387347.2	1503	.	.	non_coding_transcript_exon_variant	MODIFIER	.	.	.	.	.	.	.	0.0002	0.0002	.	0.0003	0.000332882	0	0.001825	0.000452	.	.	-5.09	0.68374	0	.	.	.	.	.	.	.	.	.	.	.	.	.	.
3197	T	C	m.3197T>C	-	3	2	2	MT-RNR2	ENSG00000210082	ENST00000387347.2	1527	.	.	non_coding_transcript_exon_variant	MODIFIER	rs2854131	.	.	.	0.0315	+	+	0.0603	0.0659	0.0508	0.0395	0.0375443	0.0502744	0.164779	0.106996	.	.	-8.62	-5.1263	0	.	.	.	.	.	.	.	.	.	.	.	.	.	.
3277	G	A	m.3277G>A	-	1	1	0	MT-TL1	ENSG00000209082	ENST00000386347.1	48	.	46;0;VL;G;Y	non_coding_transcript_exon_variant	MODIFIER	rs386828902	Poss. hypertension factor	+	.	0.0008	+	+	0.0007	0.0007	0.0007	0.0006	0.000594431	0.000219539	0.002919	0.002154	.	.	-7.82	-11.6335	0	.	.	.	.	.	.	.	.	.	.	.	.	.	.
3480	A	G	m.3480A>G	-	6	4	6	MT-ND1	ENSG00000198888	ENST00000361390.2	174	K58K	.	synonymous_variant	LOW	rs28358584	.	.	.	0.0136	+	+	0.0623	0.0681	0.0632	0.0387	0.0388758	0.0313941	0.136613	0.05777	0.0028	0.0139	3.48	4.86697	1	.	.	.	.	.	.	.	.	.	.	.	.	.	.
3538	G	A	m.3538G>A	-	1	1	0	MT-ND1	ENSG00000198888	ENST00000361390.2	232	A78T	.	missense_variant	MODERATE	.	.	.	.	.	.	.	0.0005	0.0005	.	.	0	0.000219539	6e-06	0.000621	0	0.0022	2.82	7.42339	1	deleterious_low_confidence(0)	probably_damaging(1)	probably_damaging(1)	tolerated(0.105)	tolerated(2.71)	medium(2.045)	polymorphism(1)	complex_aae	damaging(-3.5)	deleterious(0.945)	low_pathogenicity(0.68)	neutral(0.287)	neutral(0.298)	neutral(0.132)
3643	G	A	m.3643G>A	-	1	1	0	MT-ND1	ENSG00000198888	ENST00000361390.2	337	V113I	.	missense_variant	MODERATE	.	.	.	.	0.0008	-	+	0	0	.	.	0	0	0.000166	6.6e-05	0.0543	0.0899	4.53	6.26138	1	deleterious_low_confidence(0)	possibly_damaging(0.877)	possibly_damaging(0.798)	tolerated(0.06)	tolerated(2.34)	medium(2.815)	polymorphism(1)	complex_aae	neutral(-0.92)	deleterious(0.745)	high_pathogenicity(0.738)	neutral(0.306)	neutral(0.415)	neutral(0.295)
3645	T	C	m.3645T>C	-	1	1	1	MT-ND1	ENSG00000198888	ENST00000361390.2	339	V113V	.	synonymous_variant	LOW	rs879239695	.	.	.	.	.	.	0.0007	0.0007	0.0013	0.0013	0.00116509	0.00153677	0.006497	0.003735	.	.	-9.06	-20	0	.	.	.	.	.	.	.	.	.	.	.	.	.	.
3666	G	A	m.3666G>A	-	1	0	1	MT-ND1	ENSG00000198888	ENST00000361390.2	360	G120G	.	synonymous_variant	LOW	rs28357968	.	.	.	0.0469	+	+	0.0135	0.0146	0.0065	0.0224	0.0253228	0.00702525	0.058443	0.009121	0.0004	0.0065	-9.06	-5.5911	0	.	.	.	.	.	.	.	.	.	.	.	.	.	.
3712	G	A	m.3712G>A	-	1	1	0	MT-ND1	ENSG00000198888	ENST00000361390.2	406	V136M	.	missense_variant	MODERATE	.	.	.	.	.	.	.	0	0	.	.	0	0	0	0	0.0004	0.003	3.71	6.26138	1	deleterious_low_confidence(0)	probably_damaging(1)	probably_damaging(1)	tolerated(0.027)	tolerated(2.57)	medium(2.035)	polymorphism(1)	complex_aae	neutral(-0.86)	deleterious(0.945)	high_pathogenicity(0.717)	neutral(0.287)	neutral(0.429)	neutral(0.213)
3715	G	A	m.3715G>A	-	2	2	0	MT-ND1	ENSG00000198888	ENST00000361390.2	409	A137T	.	missense_variant	MODERATE	.	.	.	.	0.0004	-	+	0	0	.	.	0	0	0.000209	0	0.0002	0	4.53	4.40217	1	deleterious_low_confidence(0)	probably_damaging(1)	probably_damaging(1)	tolerated(0.2)	tolerated(2.07)	high(4.53)	polymorphism(1)	complex_aae	damaging(-3.63)	deleterious(0.945)	high_pathogenicity(0.785)	neutral(0.303)	disease(0.718)	neutral(0.481)
3814	G	A	m.3814G>A	-	2	2	0	MT-ND1	ENSG00000198888	ENST00000361390.2	508	E170K	.	missense_variant	MODERATE	.	.	.	.	.	.	.	.	.	.	.	0	0	0	0	0.0001	0.007	2.84	6.26138	1	deleterious_low_confidence(0.03)	probably_damaging(0.999)	probably_damaging(0.999)	tolerated(0.082)	tolerated(2.77)	low(1.01)	polymorphism(1)	complex_aae	damaging(-3.5)	deleterious(0.855)	high_pathogenicity(0.777)	neutral(0.191)	neutral(0.494)	neutral(0.127)
3918	G	A	m.3918G>A	-	1	0	1	MT-ND1	ENSG00000198888	ENST00000361390.2	612	E204E	.	synonymous_variant	LOW	rs28357972	.	.	.	0.0238	+	+	0.0059	0.0064	0.0065	0.0089	0.00998645	0.00175631	0.035411	0.0047	0.0027	0.021	1.72	-0.0134646	0.84252	.	.	.	.	.	.	.	.	.	.	.	.	.	.
3928	G	A	m.3928G>A	-	1	1	0	MT-ND1	ENSG00000198888	ENST00000361390.2	622	V208I	.	missense_variant	MODERATE	.	.	.	.	0.0008	-	+	0.0001	0.0001	.	.	0	0	0.000145	0	0.0126	0.0151	4.53	7.42339	1	deleterious_low_confidence(0.01)	benign(0.043)	benign(0.12)	tolerated(0.058)	tolerated(2.32)	medium(3.21)	polymorphism(1)	complex_aae	neutral(-0.95)	neutral(0.415)	low_pathogenicity(0.642)	neutral(0.34)	disease(0.552)	neutral(0.357)
4092	G	A	m.4092G>A	-	3	3	0	MT-ND1	ENSG00000198888	ENST00000361390.2	786	K262K	.	synonymous_variant	LOW	rs1569483915	.	.	.	.	.	.	0.0014	0.0015	.	0.0025	0.00254417	0.00219539	0.012239	0.004682	.	.	-0.322	1.38094	0.622047	.	.	.	.	.	.	.	.	.	.	.	.	.	.
4216	T	C	m.4216T>C	-	3	0	3	MT-ND1	ENSG00000198888	ENST00000361390.2	910	Y304H	.	missense_variant	MODERATE	rs1599988	LHON / Insulin Resistance /possible adaptive high altitude variant	+	.	0.0429	+	+	0.1389	0.152	0.0469	0.0987	0.0984616	0.106257	0.360669	0.192852	1	1	-6.78	0.0332598	0.976378	tolerated_low_confidence(1)	benign(0)	benign(0.006)	tolerated(0.011)	tolerated(2.8)	neutral(0.01)	polymorphism(1)	complex_aae	neutral(3.51)	neutral(0.000)	low_pathogenicity(0.611)	neutral(0.112)	neutral(0.16)	neutral(0.074)
4277	T	C	m.4277T>C	-	1	0	1	MT-TI	ENSG00000210100	ENST00000387365.1	15	.	16;II;DL;U;N	non_coding_transcript_exon_variant	MODIFIER	rs876661358	HCM / Poss. hypertension factor	+	.	.	.	.	0.0003	0.0003	.	0.0004	0.000332882	0.000219539	0.001697	0.001245	.	.	-9.06	-2.06324	0	.	.	.	.	.	.	.	.	.	.	.	.	.	.
4878	G	A	m.4878G>A	-	1	1	0	MT-ND2	ENSG00000198763	ENST00000361453.3	409	A137T	.	missense_variant	MODERATE	.	.	.	.	.	.	.	.	.	.	.	0	0	0	0	0	0	3.88	6.08983	1	deleterious(0)	probably_damaging(1)	probably_damaging(1)	tolerated(0.084)	tolerated(4.25)	high(3.64)	polymorphism(1)	complex_aae	damaging(-3.93)	deleterious(0.945)	high_pathogenicity(0.746)	disease(0.587)	disease(0.53)	neutral(0.244)
4917	A	G	m.4917A>G	-	5	2	5	MT-ND2	ENSG00000198763	ENST00000361453.3	448	N150D	.	missense_variant	MODERATE	rs28357980	LHON / Insulin Resistance / AMD / NRTI-PN	+	.	0.0197	+	+	0.073	0.0799	0.073	0.0476	0.0466272	0.0548847	0.175765	0.100978	0.9739	0.9313	0.148	2.12976	0.496063	tolerated(0.09)	benign(0.129)	benign(0.06)	tolerated(0.059)	tolerated(4.6)	low(1.695)	polymorphism(1)	complex_aae	damaging(-3.86)	neutral(0.300)	low_pathogenicity(0.628)	disease(0.663)	neutral(0.423)	neutral(0.243)
5004	T	C	m.5004T>C	-	1	0	1	MT-ND2	ENSG00000198763	ENST00000361453.3	535	L179L	.	synonymous_variant	LOW	rs41419549	.	.	.	0.0045	+	+	0.0109	0.0119	0.0052	0.0067	0.00691918	0.0050494	0.036	0.013014	0	0.0111	-4.41	-4.85858	0	.	.	.	.	.	.	.	.	.	.	.	.	.	.
5031	G	A	m.5031G>A	-	1	1	0	MT-ND2	ENSG00000198763	ENST00000361453.3	562	G188*	.	stop_gained	HIGH	.	.	.	.	.	.	.	.	.	.	.	.	.	0	0	0.0001	0	4.94	6.32277	1	.	.	.	tolerated(0.324)	tolerated(3.39)	high(5.145)	disease_causing(1)	complex_aae	damaging(-7.65)	.	.	.	.	.
5045	A	G	m.5045A>G	-	1	1	1	MT-ND2	ENSG00000198763	ENST00000361453.3	576	A192A	.	synonymous_variant	LOW	.	.	.	.	.	.	.	0.0001	0.0001	.	0.0001	9.5109e-05	0	0.000669	0	.	.	-9.88	-2.99502	0	.	.	.	.	.	.	.	.	.	.	.	.	.	.
5400	G	A	m.5400G>A	-	1	1	0	MT-ND2	ENSG00000198763	ENST00000361453.3	931	V311M	.	missense_variant	MODERATE	.	.	.	.	0.0004	-	+	0	0	.	.	0	0	7.7e-05	0.000769	0.0016	0.0053	-9.89	-0.870756	0	tolerated(0.94)	benign(0.153)	benign(0.055)	tolerated(0.003)	tolerated(1.98)	neutral(-0.17)	polymorphism(1)	complex_aae	neutral(-0.28)	neutral(0.004)	low_pathogenicity(0.486)	neutral(0.458)	neutral(0.206)	neutral(0.062)
5437	C	T	m.5437C>T	-	2	1	1	MT-ND2	ENSG00000198763	ENST00000361453.3	968	T323I	.	missense_variant	MODERATE	.	.	.	.	.	.	.	0.0013	0.0013	.	0.0005	0.000499322	0.000439078	0.002091	0.000975	0.0164	0.0075	-10.1	-1.80389	0	tolerated(0.33)	possibly_damaging(0.683)	benign(0.109)	tolerated(0.016)	tolerated(1.85)	low(1.09)	polymorphism(1)	complex_aae	neutral(-0.68)	neutral(0.033)	low_pathogenicity(0.586)	neutral(0.422)	neutral(0.365)	neutral(0.092)
5454	C	T	m.5454C>T	-	1	1	0	MT-ND2	ENSG00000198763	ENST00000361453.3	985	L329F	.	missense_variant	MODERATE	.	.	.	.	.	.	.	.	.	.	.	0	0	0	0	0.0015	0	-10.1	-2.97031	0	deleterious(0.01)	probably_damaging(0.994)	probably_damaging(0.962)	tolerated(0.053)	tolerated(1.58)	low(0.975)	polymorphism(1)	complex_aae	damaging(-2.87)	deleterious(0.810)	low_pathogenicity(0.634)	disease(0.649)	neutral(0.304)	neutral(0.114)
5460	G	A	m.5460G>A	-	2	1	1	MT-ND2	ENSG00000198763	ENST00000361453.3	991	A331T	.	missense_variant	MODERATE	rs3021088	AD / PD	+	+	0.0709	+	+	0.0485	0.0528	0.0522	0.0652	0.0603704	0.0572997	0.192177	0.119561	1	0.6786	-9.74	-1.10404	0	tolerated(0.38)	benign(0)	benign(0)	tolerated(0.005)	tolerated(2.12)	neutral(-0.785)	polymorphism(1)	complex_aae	neutral(0.8)	neutral(0.018)	low_pathogenicity(0.505)	neutral(0.37)	neutral(0.082)	neutral(0.023)
5803	C	T	m.5803C>T	-	1	1	0	MT-TC	ENSG00000210140	ENST00000387405.1	24	.	29;II;CS;G;N	non_coding_transcript_exon_variant	MODIFIER	.	.	.	.	.	.	.	0	.	.	.	0	0	0	0.000181	.	.	5.18	0.995512	0.574803	.	.	.	.	.	.	.	.	.	.	.	.	.	.
5849	G	A	m.5849G>A	-	1	1	0	MT-TY	ENSG00000210144	ENST00000387409.1	43	.	48;II;VL;C;Y	non_coding_transcript_exon_variant	MODIFIER	.	.	.	.	.	.	.	0	0	.	.	0	0.000219539	6.9e-05	0.000658	.	.	1.75	3.09506	1	.	.	.	.	.	.	.	.	.	.	.	.	.	.
5894	A	AC	m.5894_5895insC	-	1	0	1	.	.	.	.	.	.	intergenic_variant	MODIFIER	rs371451834	.	.	.	.	.	.	0.0065	0.0072	0.0033	0	.	.	.	.	.	.	-1.28	-2.73702	0	.	.	.	.	.	.	.	.	.	.	.	.	.	.
6261	G	A	m.6261G>A	-	2	0	2	MT-CO1	ENSG00000198804	ENST00000361624.2	358	A120T	.	missense_variant	MODERATE	rs201262114	Prostate Cancer / LHON	+	.	0.0054	+	+	0.007	0.0077	0.0059	0.0072	0.00725206	0.00548847	0.030939	0.013329	0.0963	0.3375	4.46	7.53117	1	tolerated_low_confidence(0.23)	probably_damaging(0.998)	probably_damaging(0.988)	tolerated(0.006)	tolerated(2.82)	neutral(0.465)	disease_causing(0.914)	simple_aae	neutral(0.27)	deleterious(0.489)	low_pathogenicity(0.572)	neutral(0.257)	neutral(0.208)	neutral(0.117)
6340	C	T	m.6340C>T	-	1	0	1	MT-CO1	ENSG00000198804	ENST00000361624.2	437	T146I	.	missense_variant	MODERATE	.	Prostate Cancer	+	.	0.0004	+	-	0.0012	0.0012	0.0013	0.0016	0.00173574	0.000878156	0.007975	0.003054	0.0318	0.0915	4.35	3.09818	0.0314961	deleterious_low_confidence(0.02)	benign(0.025)	benign(0.111)	tolerated(0.037)	tolerated(2.84)	medium(2.165)	polymorphism(1)	simple_aae	neutral(-1.85)	neutral(0.390)	low_pathogenicity(0.597)	neutral(0.211)	neutral(0.326)	neutral(0.145)
6440	C	T	m.6440C>T	-	1	1	0	MT-CO1	ENSG00000198804	ENST00000361624.2	537	Y179Y	.	synonymous_variant	LOW	.	.	.	.	.	.	.	0	0	.	.	0	0	0	0	.	.	-6.72	-2.96801	0	.	.	.	.	.	.	.	.	.	.	.	.	.	.
6446	G	A	m.6446G>A	-	1	1	0	MT-CO1	ENSG00000198804	ENST00000361624.2	543	T181T	.	synonymous_variant	LOW	rs386420010	.	.	.	.	.	.	0.0034	0.0038	0.0033	0.0058	0.00656252	0.000878156	0.027098	0.002197	.	.	-10.6	-11.3673	0	.	.	.	.	.	.	.	.	.	.	.	.	.	.
6480	G	A	m.6480G>A	-	1	1	0	MT-CO1	ENSG00000198804	ENST00000361624.2	577	V193I	.	missense_variant	MODERATE	rs199476128	Prostate Cancer / enriched in POAG cohort	+	.	0.0058	+	+	0.0025	0.0027	0.0013	0.0029	0.00328126	0.00197585	0.008931	0.005404	0.0538	0.0793	4.48	3.09818	1	tolerated_low_confidence(0.88)	benign(0)	benign(0.001)	tolerated(0.011)	tolerated(2.87)	neutral(-0.68)	disease_causing_automatic(0)	simple_aae	neutral(0.35)	neutral(0.000)	low_pathogenicity(0.664)	neutral(0.177)	neutral(0.13)	neutral(0.018)
6518	C	T	m.6518C>T	-	1	0	1	MT-CO1	ENSG00000198804	ENST00000361624.2	615	G205G	.	synonymous_variant	LOW	rs879050330	.	.	.	.	.	.	0.0041	0.0044	0.0059	0.0026	0.00233017	0.00285401	0.009756	0.006323	.	.	-10.6	-15.3337	0	.	.	.	.	.	.	.	.	.	.	.	.	.	.
6993	G	A	m.6993G>A	-	1	1	0	MT-CO1	ENSG00000198804	ENST00000361624.2	1090	D364N	.	missense_variant	MODERATE	.	.	.	.	.	.	.	.	.	.	.	2.37773e-05	0	7e-06	0	0.0001	0.0306	5.16	9.39769	1	deleterious_low_confidence(0)	benign(0.017)	benign(0.05)	tolerated(0.256)	tolerated(2.81)	medium(3.465)	disease_causing(0.997)	simple_aae	damaging(-2.91)	neutral(0.447)	high_pathogenicity(0.863)	neutral(0.425)	disease(0.722)	disease(0.553)
7028	C	T	m.7028C>T	+	3	0	3	MT-CO1	ENSG00000198804	ENST00000361624.2	1125	A375A	.	synonymous_variant	LOW	rs2015062	.	.	.	.	.	.	0.6076	0.6711	0.4381	0.8088	0.818912	0.726894	0.76067	0.474115	0	0	-10.3	-9.26751	0	.	.	.	.	.	.	.	.	.	.	.	.	.	.
7194	C	T	m.7194C>T	-	1	1	0	MT-CO1	ENSG00000198804	ENST00000361624.2	1291	L431F	.	missense_variant	MODERATE	.	.	.	.	.	.	.	0	0	.	0	2.37773e-05	0	0.000141	0	0.0026	0.1102	-3.48	0.0650866	0	deleterious_low_confidence(0)	probably_damaging(0.999)	probably_damaging(0.998)	tolerated(0.132)	tolerated(2.52)	high(4.245)	disease_causing(0.975)	simple_aae	neutral(-1.64)	deleterious(0.919)	high_pathogenicity(0.739)	disease(0.681)	neutral(0.457)	disease(0.536)
7200	C	T	m.7200C>T	-	1	1	0	MT-CO1	ENSG00000198804	ENST00000361624.2	1297	L433L	.	synonymous_variant	LOW	.	.	.	.	.	.	.	0	0	.	.	0	0	0	0	.	.	-1.8	-0.868173	0	.	.	.	.	.	.	.	.	.	.	.	.	.	.
7252	G	A	m.7252G>A	-	2	2	0	MT-CO1	ENSG00000198804	ENST00000361624.2	1349	W450*	.	stop_gained	HIGH	.	.	.	.	.	.	.	.	.	.	.	0	0	0	0	0.0011	0.0314	5.23	9.631	1	.	.	.	.	.	.	disease_causing(1)	complex_aae	.	.	.	.	.	.
7269	G	A	m.7269G>A	-	3	3	0	MT-CO1	ENSG00000198804	ENST00000361624.2	1366	V456M	.	missense_variant	MODERATE	rs386829004	.	.	.	0.0054	+	+	0.0021	0.0022	0.0007	0.0017	0.00192596	0.00131723	0.008899	0.004472	0.0784	0.5729	-2.82	0.998346	0.19685	tolerated_low_confidence(0.31)	benign(0.004)	benign(0.018)	tolerated(0.006)	tolerated(2.18)	neutral(-1.305)	polymorphism(1)	simple_aae	neutral(0.25)	neutral(0.028)	low_pathogenicity(0.677)	neutral(0.369)	neutral(0.099)	neutral(0.128)
7689	G	A	m.7689G>A	-	1	1	0	MT-CO2	ENSG00000198712	ENST00000361739.1	104	C35Y	.	missense_variant	MODERATE	.	.	.	.	.	.	.	0	0	.	.	0	0	0.000305	0	0.0053	0.031	5.29	9.39769	1	deleterious_low_confidence(0)	benign(0.198)	benign(0.136)	tolerated(0.037)	tolerated(1.59)	medium(2.02)	disease_causing(0.513)	simple_aae	neutral(-1.53)	neutral(0.456)	low_pathogenicity(0.612)	.	disease(0.62)	disease(0.62)
7702	G	A	m.7702G>A	-	1	1	0	MT-CO2	ENSG00000198712	ENST00000361739.1	117	L39L	.	synonymous_variant	LOW	.	.	.	.	.	.	.	0.0012	0.0013	.	0.001	0.0010462	0.000878156	0.004253	0.001682	.	.	-11.1	-20	0	.	.	.	.	.	.	.	.	.	.	.	.	.	.
7754	G	A	m.7754G>A	-	1	0	1	MT-CO2	ENSG00000198712	ENST00000361739.1	169	D57N	.	missense_variant	MODERATE	rs1556423339	.	.	.	.	.	.	0.0007	0.0007	0.0007	0.0006	0.000594431	0	0.00318	0.001199	0.0266	0.0336	3.65	3.09818	1	tolerated_low_confidence(0.05)	benign(0.002)	benign(0.004)	tolerated(0.099)	tolerated(1.53)	low(1.625)	polymorphism(0.657)	simple_aae	damaging(-3.56)	neutral(0.346)	low_pathogenicity(0.499)	.	neutral(0.483)	neutral(0.194)
7796	A	G	m.7796A>G	-	1	0	1	MT-CO2	ENSG00000198712	ENST00000361739.1	211	I71V	.	missense_variant	MODERATE	.	.	.	.	0.0004	+	-	0.0001	0.0001	.	0.0001	9.5109e-05	0.000658617	0.000504	0.001485	0.0078	0.052	-5.59	0.298402	0	tolerated_low_confidence(0.52)	benign(0)	benign(0.001)	tolerated(0.016)	tolerated(1.6)	low(0.855)	polymorphism(1)	simple_aae	neutral(-0.59)	neutral(0.009)	low_pathogenicity(0.587)	.	neutral(0.225)	neutral(0.085)
7840	C	T	m.7840C>T	-	1	1	0	MT-CO2	ENSG00000198712	ENST00000361739.1	255	Y85Y	.	synonymous_variant	LOW	.	.	.	.	.	.	.	0.0001	0.0001	.	0.0001	0.000118886	0	0.000565	0	.	.	-8.13	-4.83453	0	.	.	.	.	.	.	.	.	.	.	.	.	.	.
7866	C	T	m.7866C>T	-	1	1	0	MT-CO2	ENSG00000198712	ENST00000361739.1	281	S94F	.	missense_variant	MODERATE	.	.	.	.	.	.	.	0.0009	0.0005	.	.	0	0	6e-06	0	0.0015	0.0236	-5.06	0.298402	0	deleterious_low_confidence(0.03)	probably_damaging(1)	probably_damaging(0.994)	tolerated(0.011)	tolerated(1.96)	low(1.185)	polymorphism(1)	simple_aae	neutral(-0.62)	deleterious(0.826)	low_pathogenicity(0.293)	disease(0.887)	neutral(0.46)	disease(0.583)
7873	C	T	m.7873C>T	-	2	0	2	MT-CO2	ENSG00000198712	ENST00000361739.1	288	T96T	.	synonymous_variant	LOW	rs879161183	.	.	.	0.0004	+	+	0.0022	0.0025	0.0013	0.0026	0.00242528	0.00153677	0.010041	0.002666	0.001	0.0009	-10.4	-7.86762	0	.	.	.	.	.	.	.	.	.	.	.	.	.	.
7996	C	T	m.7996C>T	-	1	1	0	MT-CO2	ENSG00000198712	ENST00000361739.1	411	D137D	.	synonymous_variant	LOW	.	.	.	.	.	.	.	0.0001	0.0001	.	0.0001	4.75545e-05	0.000219539	0.000245	0.000543	.	.	2.33	1.69829	1	.	.	.	.	.	.	.	.	.	.	.	.	.	.
8014	A	T	m.8014A>T	-	1	0	1	MT-CO2	ENSG00000198712	ENST00000361739.1	429	V143V	.	synonymous_variant	LOW	rs879223416	.	.	.	.	.	.	0.0025	0.0027	0.0059	0.0027	0.00233017	0.0039517	0.030732	0.023302	.	.	-10.4	-20	0	.	.	.	.	.	.	.	.	.	.	.	.	.	.
8152	G	A	m.8152G>A	-	1	0	1	MT-CO2	ENSG00000198712	ENST00000361739.1	567	P189P	.	synonymous_variant	LOW	.	.	.	.	.	.	.	0.004	0.0044	0.002	0.0178	0.0161923	0.00439078	0.033324	0.007605	.	.	-10.3	-3.90127	0	.	.	.	.	.	.	.	.	.	.	.	.	.	.
8541	G	A	m.8541G>A	-	1	1	0	MT-ATP8	ENSG00000228253	ENST00000361851.1	176	C59Y	.	missense_variant	MODERATE	rs1569484218	.	.	.	0.0012	+	-	0.0005	0.0005	0.0007	0.0003	0.000285327	0.000219539	0.00081	0.000292	0.0012	0.0045	5.07	-0.182283	0.787402	tolerated(1)	benign(0)	benign(0)	tolerated(0.05)	tolerated(2.46)	.	disease_causing/polymorphism(1,0.545646)	without_aae/simple_aae	neutral(5.76)	neutral(0.000)	low_pathogenicity(0.614)	neutral(0.117)	neutral(0.228)	neutral(0.016)
8541	G	A	m.8541G>A	-	1	1	0	MT-ATP6	ENSG00000198899	ENST00000361899.2	15	L5L	.	synonymous_variant	LOW	rs1569484218	.	.	.	0.0012	+	-	0.0005	0.0005	0.0007	0.0003	0.000285327	0.000219539	0.00081	0.000292	0.0012	0.0045	5.07	-0.182283	0.787402	.	.	.	.	.	.	.	.	.	.	.	.	.	.
8669	G	A	m.8669G>A	-	1	1	0	MT-ATP6	ENSG00000198899	ENST00000361899.2	143	W48*	.	stop_gained	HIGH	.	.	.	.	.	.	.	0	0	.	.	0	0	0	0.000829	0.0077	0.0074	3.25	3.08181	0.984252	.	.	.	.	.	.	disease_causing(1)	complex_aae	.	.	.	.	.	.
8697	G	A	m.8697G>A	-	6	1	5	MT-ATP6	ENSG00000198899	ENST00000361899.2	171	M57M	.	synonymous_variant	LOW	rs879233543	.	.	.	0.0222	+	+	0.0712	0.0777	0.0743	0.0466	0.0456048	0.0535675	0.173384	0.100309	0.0005	0.0049	-4.54	-0.881732	0	.	.	.	.	.	.	.	.	.	.	.	.	.	.
9055	G	A	m.9055G>A	-	6	1	6	MT-ATP6	ENSG00000198899	ENST00000361899.2	529	A177T	.	missense_variant	MODERATE	rs193303045	PD protective factor	+	.	0.0189	+	+	0.0654	0.0714	0.073	0.042	0.0429179	0.0362239	0.169921	0.069881	0.215	0.1871	3.26	2.14921	0.984252	tolerated(0.1)	possibly_damaging(0.845)	benign(0.399)	tolerated(0.057)	tolerated(4.4)	low(1.485)	polymorphism(0.999)	simple_aae	damaging(-2.61)	.	low_pathogenicity(0.492)	disease(0.501)	neutral(0.381)	neutral(0.269)
9064	G	A	m.9064G>A	-	1	1	0	MT-ATP6	ENSG00000198899	ENST00000361899.2	538	A180T	.	missense_variant	MODERATE	rs386420013	.	.	.	0.0025	+	+	0.0014	0.0014	.	0.0025	0.00268683	0.00131723	0.012194	0.002758	0.0116	0.0061	2.36	0.284016	0	tolerated(0.46)	benign(0.011)	benign(0.02)	tolerated(0.01)	tolerated(4.51)	neutral(0.35)	polymorphism(1)	simple_aae	neutral(-0.54)	.	low_pathogenicity(0.61)	neutral(0.251)	neutral(0.202)	neutral(0.083)
9102	C	A	m.9102C>A	-	1	0	1	MT-ATP6	ENSG00000198899	ENST00000361899.2	576	I192M	.	missense_variant	MODERATE	.	.	.	.	.	.	.	0.0001	0.0001	.	0.0001	0.000142663	0	0.001432	0	0.0067	0.0061	-9.8	-7.40992	0	deleterious(0.03)	possibly_damaging(0.92)	possibly_damaging(0.703)	.	.	.	.	.	.	deleterious(0.617)	low_pathogenicity(0.604)	neutral(0.332)	neutral(0.164)	neutral(0.079)
9111	T	C	m.9111T>C	-	1	0	1	MT-ATP6	ENSG00000198899	ENST00000361899.2	585	I195I	.	synonymous_variant	LOW	.	.	.	.	.	.	.	0.0007	0.0008	0.0013	0.0017	0.00159308	0.000219539	0.005283	0.001649	.	.	-9.8	-11.6066	0	.	.	.	.	.	.	.	.	.	.	.	.	.	.
9266	G	A	m.9266G>A	-	1	0	1	MT-CO3	ENSG00000198938	ENST00000362079.2	60	G20G	.	synonymous_variant	LOW	rs374335946	.	.	.	.	.	.	0.0057	0.0062	0.0091	0.0049	0.005017	0.00526894	0.020543	0.010979	0.0021	0.0267	-5.03	-2.26806	0	.	.	.	.	.	.	.	.	.	.	.	.	.	.
9376	G	A	m.9376G>A	-	1	1	0	MT-CO3	ENSG00000198938	ENST00000362079.2	170	W57*	.	stop_gained	HIGH	.	.	.	.	.	.	.	.	.	.	.	0	0	4e-06	2.3e-05	0.0023	0	4.97	6.36459	1	.	.	.	.	.	.	disease_causing(1)	complex_aae	.	.	.	.	.	.
9698	T	C	m.9698T>C	-	6	2	6	MT-CO3	ENSG00000198938	ENST00000362079.2	492	L164L	.	synonymous_variant	LOW	rs9743	.	.	.	0.0153	+	+	0.0644	0.0704	0.0606	0.04	0.0413011	0.0320527	0.162677	0.062767	0.0088	0.052	-10.3	-16.0336	0	.	.	.	.	.	.	.	.	.	.	.	.	.	.
9716	T	C	m.9716T>C	-	1	0	1	MT-CO3	ENSG00000198938	ENST00000362079.2	510	G170G	.	synonymous_variant	LOW	rs41502750	.	.	.	0.0041	+	-	0.0136	0.0149	0.0078	0.0104	0.011199	0.007464	0.048017	0.014564	0.0045	0.04	-10.3	7.706	1	.	.	.	.	.	.	.	.	.	.	.	.	.	.
9786	G	A	m.9786G>A	-	1	1	0	MT-CO3	ENSG00000198938	ENST00000362079.2	580	G194S	.	missense_variant	MODERATE	.	.	.	.	0.0008	-	+	0.0003	0.0005	.	.	0	0.000219539	0	0.000569	0.0069	0.0534	5.13	6.13128	1	deleterious_low_confidence(0.01)	probably_damaging(1)	probably_damaging(0.999)	tolerated(0.176)	tolerated(0.94)	medium(3.305)	polymorphism(1)	complex_aae	damaging(-5.74)	.	high_pathogenicity(0.893)	neutral(0.497)	neutral(0.479)	disease(0.69)
9857	C	T	m.9857C>T	-	1	1	0	MT-CO3	ENSG00000198938	ENST00000362079.2	651	I217I	.	synonymous_variant	LOW	.	.	.	.	.	.	.	0	0	.	0.0001	4.75545e-05	0.000219539	0.000178	0.000453	.	.	-10.3	-14.6338	0	.	.	.	.	.	.	.	.	.	.	.	.	.	.
9926	A	G	m.9926A>G	-	1	0	1	MT-CO3	ENSG00000198938	ENST00000362079.2	720	W240W	.	synonymous_variant	LOW	.	.	.	.	.	.	.	0.0003	0.0003	.	0.0003	0.000380436	0.000219539	0.001589	0.000345	.	.	2.35	4.03144	1	.	.	.	.	.	.	.	.	.	.	.	.	.	.
9942	G	A	m.9942G>A	-	1	1	0	MT-CO3	ENSG00000198938	ENST00000362079.2	736	D246N	.	missense_variant	MODERATE	rs28715301	.	.	.	0.0004	-	+	0	.	.	.	0	0.000219539	9.4e-05	0.00046	0.0113	0.0543	5.13	7.53117	1	deleterious_low_confidence(0.02)	probably_damaging(0.995)	probably_damaging(0.993)	tolerated(0.469)	tolerated(1.43)	high(4.57)	polymorphism(1)	complex_aae	damaging(-4.3)	.	high_pathogenicity(0.827)	neutral(0.474)	disease(0.565)	disease(0.597)
9966	G	A	m.9966G>A	-	1	0	1	MT-CO3	ENSG00000198938	ENST00000362079.2	760	V254I	.	missense_variant	MODERATE	rs200809063	LHON possible helper variant	.	.	0.0091	+	+	0.0055	0.006	0.0026	0.0069	0.00687163	0.0079034	0.024342	0.018629	0.2074	0.2243	1.69	0.0650866	0	tolerated_low_confidence(0.77)	benign(0)	benign(0)	tolerated(0.012)	tolerated(2.22)	neutral(-0.295)	polymorphism(1)	complex_aae	neutral(0.19)	neutral(0.001)	low_pathogenicity(0.255)	neutral(0.178)	neutral(0.162)	neutral(0.043)
10148	C	T	m.10148C>T	-	1	1	0	MT-ND3	ENSG00000198840	ENST00000361227.2	90	Y30Y	.	synonymous_variant	LOW	.	.	.	.	.	.	.	0	0	.	.	0	0	8.1e-05	0	.	.	-1.3	-2.26806	0	.	.	.	.	.	.	.	.	.	.	.	.	.	.
10165	C	T	m.10165C>T	-	1	1	0	MT-ND3	ENSG00000198840	ENST00000361227.2	107	P36L	.	missense_variant	MODERATE	.	.	.	.	.	.	.	.	.	.	.	0	0	0	0	0.0002	0.0075	5.07	5.66465	0.992126	deleterious_low_confidence(0)	probably_damaging(1)	probably_damaging(1)	damaging(0.732)	tolerated(0.85)	high(4.02)	polymorphism(0.999)	complex_aae	damaging(-9.43)	.	high_pathogenicity(0.704)	disease(0.841)	disease(0.645)	disease(0.731)
10352	A	G	m.10352A>G	-	1	1	1	MT-ND3	ENSG00000198840	ENST00000361227.2	294	L98L	.	synonymous_variant	LOW	.	.	.	.	.	.	.	0.0002	0.0002	.	0.0004	0.000356659	0.000439078	0.001629	0.00397	.	.	0.0866	-0.634858	0	.	.	.	.	.	.	.	.	.	.	.	.	.	.
10398	A	G	m.10398A>G	+	4	3	4	MT-ND3	ENSG00000198840	ENST00000361227.2	340	T114A	.	missense_variant	MODERATE	rs2853826	PD protective factor / longevity / altered cell pH / metabolic syndrome / breast cancer risk / LS risk / ADHD / cognitive decline / SCA2 age of onset	+	.	.	.	.	0.274	0.3024	0.2269	0.4432	0.453028	0.375192	1	0.467387	1	1	-10.3	-0.401543	0	tolerated_low_confidence(1)	benign(0)	benign(0)	tolerated(0.177)	tolerated(2.04)	neutral(-0.6)	polymorphism(1)	complex_aae	neutral(-1.39)	neutral(0.000)	low_pathogenicity(0.17)	neutral(0.087)	neutral(0.093)	neutral(0.014)
10427	G	A	m.10427G>A	-	1	1	0	MT-TR	ENSG00000210174	ENST00000387439.1	23	.	26;II;-;G;Y	non_coding_transcript_exon_variant	MODIFIER	rs1556423809	.	.	.	.	.	.	0.0006	0.0006	0.0013	0.0012	0.00109375	0.00197585	0.004839	0.004254	.	.	-3.54	-0.168228	0	.	.	.	.	.	.	.	.	.	.	.	.	.	.
10452	G	A	m.10452G>A	-	1	1	0	MT-TR	ENSG00000210174	ENST00000387439.1	48	.	52;II;TS;G;N	non_coding_transcript_exon_variant	MODIFIER	.	.	.	.	.	.	.	0	.	.	.	0	0	0	0	.	.	4.32	4.49807	1	.	.	.	.	.	.	.	.	.	.	.	.	.	.
10463	T	C	m.10463T>C	-	5	1	5	MT-TR	ENSG00000210174	ENST00000387439.1	59	.	67;II;AS;U;N	non_coding_transcript_exon_variant	MODIFIER	rs28358279	.	.	.	0.021	+	+	0.0717	0.0785	0.0541	0.0475	0.046437	0.0531284	0.177721	0.101434	.	.	0.848	-1.56812	0	.	.	.	.	.	.	.	.	.	.	.	.	.	.
10499	A	G	m.10499A>G	-	1	0	1	MT-ND4L	ENSG00000212907	ENST00000361335.1	30	L10L	.	synonymous_variant	LOW	rs1057520074	.	.	.	.	.	.	0.0089	0.0096	0.0222	0.0092	0.00958223	0.00680571	0.030027	0.011859	.	.	-6.43	-1.10149	0	.	.	.	.	.	.	.	.	.	.	.	.	.	.
10506	A	G	m.10506A>G	-	1	1	1	MT-ND4L	ENSG00000212907	ENST00000361335.1	37	T13A	.	missense_variant	MODERATE	rs199688733	.	.	.	0.0004	+	-	0.0038	0.0041	0.0052	0.0025	0.00249661	0.00263447	0.011453	0.006062	0.1154	0.1778	-10.1	-6.23442	0	tolerated(0.27)	benign(0.001)	benign(0.004)	tolerated(0.033)	tolerated(2)	.	polymorphism(1)	simple_aae	neutral(-1.12)	neutral(0.034)	low_pathogenicity(0.361)	neutral(0.163)	neutral(0.193)	neutral(0.14)
10530	G	A	m.10530G>A	-	1	1	0	MT-ND4L	ENSG00000212907	ENST00000361335.1	61	V21M	.	missense_variant	MODERATE	.	.	.	.	0.0008	+	-	0.0001	0.0001	.	0.0002	0.000213995	0	0.004773	0	0.0465	0.082	-9.83	-1.10149	0	tolerated(0.88)	benign(0.03)	benign(0.059)	tolerated(0.008)	tolerated(2)	.	polymorphism(1)	simple_aae	neutral(0.28)	neutral(0.004)	low_pathogenicity(0.491)	neutral(0.114)	neutral(0.167)	neutral(0.031)
10550	A	G	m.10550A>G	-	3	2	3	MT-ND4L	ENSG00000212907	ENST00000361335.1	81	M27M	.	synonymous_variant	LOW	rs28358280	.	.	.	0.0128	+	+	0.0607	0.0663	0.0561	0.0371	0.0381863	0.0300768	0.149626	0.056068	0.0093	0.0922	3.7	-1.10149	0.023622	.	.	.	.	.	.	.	.	.	.	.	.	.	.
10704	G	A	m.10704G>A	-	1	1	0	MT-ND4L	ENSG00000212907	ENST00000361335.1	235	V79I	.	missense_variant	MODERATE	rs28437034	.	.	.	.	.	.	0.0003	0.0003	0.0007	0.0002	0.000237773	0	0.001274	0	0.0107	0.0116	5.07	4.03144	1	tolerated(0.12)	benign(0.001)	benign(0.016)	tolerated(0.06)	tolerated(1.66)	.	disease_causing(0.928)	simple_aae	neutral(-0.79)	neutral(0.261)	low_pathogenicity(0.476)	neutral(0.439)	disease(0.604)	neutral(0.402)
10731	G	A	m.10731G>A	-	1	1	0	MT-ND4L	ENSG00000212907	ENST00000361335.1	262	D88N	.	missense_variant	MODERATE	.	.	.	.	.	.	.	.	.	.	.	0	0	0	0	0.0023	0.0298	5.07	4.49807	1	deleterious(0)	benign(0.066)	benign(0.08)	tolerated(0.264)	tolerated(1.66)	.	disease_causing(0.667)	simple_aae	damaging(-4.8)	neutral(0.450)	high_pathogenicity(0.752)	disease(0.592)	disease(0.683)	disease(0.757)
10737	G	A	m.10737G>A	-	1	1	0	MT-ND4L	ENSG00000212907	ENST00000361335.1	268	V90M	.	missense_variant	MODERATE	.	.	.	.	.	.	.	.	.	.	.	0	0	0	4.5e-05	0.0019	0.0247	0.559	0.0650866	0.00787402	tolerated(0.07)	possibly_damaging(0.883)	possibly_damaging(0.774)	tolerated(0.012)	tolerated(1.74)	.	polymorphism(1)	simple_aae	neutral(-0.71)	deleterious(0.607)	low_pathogenicity(0.577)	neutral(0.347)	neutral(0.302)	neutral(0.145)
10822	C	T	m.10822C>T	-	2	0	2	MT-ND4	ENSG00000198886	ENST00000361381.2	63	H21H	.	synonymous_variant	LOW	rs879041592	.	.	.	0.0008	+	+	0.0039	0.0043	0.0026	0.0039	0.0036617	0.00241493	0.015074	0.004593	0.027	0.0103	-10.1	-4.13458	0	.	.	.	.	.	.	.	.	.	.	.	.	.	.
10979	C	T	m.10979C>T	-	1	1	0	MT-ND4	ENSG00000198886	ENST00000361381.2	220	P74S	.	missense_variant	MODERATE	.	.	.	.	.	.	.	.	.	.	.	0	0	0	0	0.0022	0.01	4.9	5.66465	1	deleterious_low_confidence(0.01)	probably_damaging(0.999)	probably_damaging(0.996)	tolerated(0.106)	tolerated(1.37)	medium(2.245)	polymorphism(1)	complex_aae	damaging(-6.18)	.	high_pathogenicity(0.738)	.	neutral(0.319)	neutral(0.289)
10981	C	T	m.10981C>T	-	1	1	0	MT-ND4	ENSG00000198886	ENST00000361381.2	222	P74P	.	synonymous_variant	LOW	.	.	.	.	.	.	.	0	0	.	0	0	0.000219539	2.6e-05	0.001031	.	.	-9.8	-10.4341	0	.	.	.	.	.	.	.	.	.	.	.	.	.	.
11209	A	T	m.11209A>T	-	1	0	1	MT-ND4	ENSG00000198886	ENST00000361381.2	450	L150L	.	synonymous_variant	LOW	.	.	.	.	.	.	.	0	0	.	0	2.37773e-05	0.000219539	0.000407	0.001455	.	.	-2.33	-1.10149	0	.	.	.	.	.	.	.	.	.	.	.	.	.	.
11251	A	G	m.11251A>G	-	7	3	7	MT-ND4	ENSG00000198886	ENST00000361381.2	492	L164L	.	synonymous_variant	LOW	rs869096886	.	.	.	0.0388	+	+	0.1383	0.1512	0.1519	0.0929	0.0908291	0.100988	0.295128	0.181167	0.0002	0	-9.08	-7.16768	0	.	.	.	.	.	.	.	.	.	.	.	.	.	.
11299	T	C	m.11299T>C	-	3	2	3	MT-ND4	ENSG00000198886	ENST00000361381.2	540	T180T	.	synonymous_variant	LOW	rs28358285	.	.	.	0.0152	+	+	0.0625	0.0683	0.0619	0.0412	0.0427991	0.0305159	0.163077	0.056843	0	0	-7.77	-5.3711	0	.	.	.	.	.	.	.	.	.	.	.	.	.	.
11377	G	A	m.11377G>A	-	1	0	1	MT-ND4	ENSG00000198886	ENST00000361381.2	618	K206K	.	synonymous_variant	LOW	rs193302938	.	.	.	.	.	.	0.0145	0.0158	0.0306	0.0125	0.0122691	0.0131723	0.045261	0.024488	0.007	0.0308	3.41	1.82724	1	.	.	.	.	.	.	.	.	.	.	.	.	.	.
11420	G	A	m.11420G>A	-	1	1	0	MT-ND4	ENSG00000198886	ENST00000361381.2	661	V221I	.	missense_variant	MODERATE	.	.	.	.	.	.	.	0	0	.	.	0	0	0	0	0	0.0174	4.78	6.23913	1	deleterious_low_confidence(0)	probably_damaging(0.975)	probably_damaging(0.971)	tolerated(0.175)	tolerated(4.5)	high(5.005)	polymorphism(1)	complex_aae	neutral(-0.76)	.	high_pathogenicity(0.752)	neutral(0.279)	disease(0.605)	neutral(0.257)
11426	G	A	m.11426G>A	-	1	1	0	MT-ND4	ENSG00000198886	ENST00000361381.2	667	A223T	.	missense_variant	MODERATE	.	.	.	.	0.0004	-	+	0.0001	.	.	.	0	0	6.6e-05	0	0.0007	0	4.78	7.40016	1	deleterious_low_confidence(0)	probably_damaging(0.999)	probably_damaging(0.995)	tolerated(0.263)	tolerated(4.43)	high(5.14)	polymorphism(1)	complex_aae	damaging(-3.03)	.	high_pathogenicity(0.756)	disease(0.811)	disease(0.741)	disease(0.658)
11459	G	A	m.11459G>A	-	1	1	0	MT-ND4	ENSG00000198886	ENST00000361381.2	700	V234M	.	missense_variant	MODERATE	.	.	.	.	.	.	.	.	.	.	.	0	0	0	0	0.0003	0	-3.68	-0.262598	0	deleterious_low_confidence(0)	probably_damaging(0.999)	probably_damaging(0.997)	tolerated(0.015)	tolerated(4.68)	neutral(-0.065)	polymorphism(1)	complex_aae	neutral(0.17)	.	low_pathogenicity(0.665)	disease(0.564)	neutral(0.482)	neutral(0.428)
11467	A	G	m.11467A>G	-	9	4	9	MT-ND4	ENSG00000198886	ENST00000361381.2	708	L236L	.	synonymous_variant	LOW	rs2853493	Altered brain pH / sCJD patients	+	.	0.0717	+	+	0.1676	0.1834	0.1525	0.1242	0.123998	0.126894	0.462742	0.226221	0.0145	0.0378	-7.59	-3.04906	0	.	.	.	.	.	.	.	.	.	.	.	.	.	.
11600	G	A	m.11600G>A	-	1	1	0	MT-ND4	ENSG00000198886	ENST00000361381.2	841	D281N	.	missense_variant	MODERATE	.	.	.	.	0.0004	-	+	0	.	.	.	0	0	7e-05	0	0.0119	0	4.92	6.23913	1	deleterious_low_confidence(0)	probably_damaging(0.999)	probably_damaging(0.995)	tolerated(0.19)	tolerated(4.27)	medium(3.22)	polymorphism(1)	complex_aae	damaging(-4.72)	.	high_pathogenicity(0.876)	disease(0.768)	disease(0.564)	neutral(0.288)
11651	G	A	m.11651G>A	-	1	1	0	MT-ND4	ENSG00000198886	ENST00000361381.2	892	V298M	.	missense_variant	MODERATE	.	.	.	.	0.0004	+	-	0	0	.	0	2.37773e-05	0.000219539	9.5e-05	0.00058	0.0074	0.0161	2.16	2.98827	0.401575	deleterious_low_confidence(0)	possibly_damaging(0.85)	benign(0.436)	tolerated(0.01)	tolerated(4.71)	neutral(-0.58)	polymorphism(1)	complex_aae	neutral(0.37)	.	low_pathogenicity(0.605)	disease(0.561)	neutral(0.229)	neutral(0.239)
11656	A	C	m.11656A>C	-	1	0	1	MT-ND4	ENSG00000198886	ENST00000361381.2	897	T299T	.	synonymous_variant	LOW	.	.	.	.	.	.	.	.	.	.	.	0	0	0.000203	0	.	.	-4.71	-2.81685	0	.	.	.	.	.	.	.	.	.	.	.	.	.	.
11665	C	T	m.11665C>T	-	1	0	1	MT-ND4	ENSG00000198886	ENST00000361381.2	906	L302L	.	synonymous_variant	LOW	rs28631764	.	.	.	0.0045	+	+	0.0046	0.005	0.0013	0.0153	0.0170483	0.00658617	0.078746	0.016299	0.0041	0.0189	-9.84	-7.22874	0	.	.	.	.	.	.	.	.	.	.	.	.	.	.
11679	G	A	m.11679G>A	-	1	1	0	MT-ND4	ENSG00000198886	ENST00000361381.2	920	W307*	.	stop_gained	HIGH	.	.	.	.	0.0004	-	+	0	.	.	.	0	0	0.000102	0	0.0069	0.0105	2.08	3.45268	1	.	.	.	.	.	.	disease_causing(1)	complex_aae	.	.	.	.	.	.
11696	G	A	m.11696G>A	-	1	1	0	MT-ND4	ENSG00000198886	ENST00000361381.2	937	V313I	.	missense_variant	MODERATE	rs200873900	LHON / LDYT / DEAF / hypertension helper mut.	+	+	0.0041	+	+	0.0022	0.0025	0.0033	0.006	0.00539744	0.00965971	0.025272	0.02413	0.1253	0.078	0.489	0.898425	0	tolerated_low_confidence(0.72)	benign(0)	benign(0.005)	tolerated(0.013)	tolerated(4.76)	neutral(-1.085)	disease_causing_automatic(0)	complex_aae	neutral(-0.32)	neutral(0.002)	low_pathogenicity(0.581)	neutral(0.333)	neutral(0.133)	neutral(0.041)
11719	G	A	m.11719G>A	+	15	0	15	MT-ND4	ENSG00000198886	ENST00000361381.2	960	G320G	.	synonymous_variant	LOW	rs2853495	.	.	.	.	.	.	0.6305	0.6323	0.5007	0.7757	0.786361	0.685181	0.831047	0.49082	0.0043	0.0201	-9.24	-12.3372	0	.	.	.	.	.	.	.	.	.	.	.	.	.	.
11812	A	G	m.11812A>G	-	5	2	5	MT-ND4	ENSG00000198886	ENST00000361381.2	1053	L351L	.	synonymous_variant	LOW	rs3088053	.	.	.	.	.	.	0.0543	0.0592	0.0574	0.0334	0.0322895	0.039517	0.125907	0.076609	.	.	-9.24	-11.4084	0	.	.	.	.	.	.	.	.	.	.	.	.	.	.
11869	C	A	m.11869C>A	-	1	0	1	MT-ND4	ENSG00000198886	ENST00000361381.2	1110	P370P	.	synonymous_variant	LOW	rs879067987	.	.	.	.	.	.	0.003	0.0033	0.0013	0.0015	0.00145041	0.00153677	0.011793	0.006347	.	.	-9.24	-7.92535	0	.	.	.	.	.	.	.	.	.	.	.	.	.	.
11914	G	A	m.11914G>A	+	2	0	2	MT-ND4	ENSG00000198886	ENST00000361381.2	1155	T385T	.	synonymous_variant	LOW	rs2853496	.	.	.	.	.	.	0.0618	0.0669	0.0495	0.1138	0.115914	0.0592755	0.345941	0.116412	0.0033	0	-5.24	-3.28126	0	.	.	.	.	.	.	.	.	.	.	.	.	.	.
11942	C	T	m.11942C>T	-	1	1	0	MT-ND4	ENSG00000198886	ENST00000361381.2	1183	L395F	.	missense_variant	MODERATE	.	.	.	.	.	.	.	0	0	.	.	0	0	0	0	0.0039	0	-1.16	-2.12024	0	tolerated_low_confidence(0.07)	probably_damaging(0.998)	probably_damaging(0.986)	tolerated(0.067)	tolerated(2.69)	low(1.635)	polymorphism(1)	complex_aae	neutral(-2.39)	.	low_pathogenicity(0.378)	disease(0.804)	neutral(0.398)	neutral(0.331)
12015	T	C	m.12015T>C	-	1	1	1	MT-ND4	ENSG00000198886	ENST00000361381.2	1256	L419P	.	missense_variant	MODERATE	.	Atypical MELAS	.	+	0.0008	-	+	0.0001	0.0001	.	0	4.75545e-05	0	0.000434	0	0.0272	0.0091	-4.39	-0.0303937	0	tolerated_low_confidence(0.25)	benign(0.001)	benign(0.002)	tolerated(0.024)	tolerated(2.53)	low(1.395)	polymorphism(1)	complex_aae	neutral(-2.12)	.	low_pathogenicity(0.539)	disease(0.936)	disease(0.612)	disease(0.566)
12070	G	A	m.12070G>A	-	1	1	0	MT-ND4	ENSG00000198886	ENST00000361381.2	1311	M437M	.	synonymous_variant	LOW	.	.	.	.	.	.	.	0.0009	0.0009	.	0.0026	0.00290083	0.000658617	0.00672	0.001392	.	.	-1.74	-0.0303937	0	.	.	.	.	.	.	.	.	.	.	.	.	.	.
12077	C	T	m.12077C>T	-	1	1	0	MT-ND4	ENSG00000198886	ENST00000361381.2	1318	H440Y	.	missense_variant	MODERATE	.	.	.	.	.	.	.	.	.	.	.	0	0	8.5e-05	0	0.0088	0	4.71	5.54252	1	deleterious_low_confidence(0)	possibly_damaging(0.951)	possibly_damaging(0.889)	tolerated(0.186)	tolerated(2.36)	high(4.165)	polymorphism(1)	complex_aae	damaging(-5.43)	.	high_pathogenicity(0.822)	disease(0.883)	disease(0.599)	neutral(0.244)
12138	G	A	m.12138G>A	-	1	1	0	MT-TH	ENSG00000210176	ENST00000387441.1	1	.	1;II;AS;G;N	non_coding_transcript_exon_variant	MODIFIER	.	.	.	.	.	.	.	0	.	.	.	0	0	0	0	.	.	4.71	4.3815	1	.	.	.	.	.	.	.	.	.	.	.	.	.	.
12192	G	A	m.12192G>A	-	1	1	0	MT-TH	ENSG00000210176	ENST00000387441.1	55	.	59;II;TL;G;N	non_coding_transcript_exon_variant	MODIFIER	rs3134560	MICM	+	.	0.0017	+	+	0.0015	0.0016	.	0.0022	0.00197351	0.00307355	0.007959	0.007123	.	.	-8.22	-4.67449	0	.	.	.	.	.	.	.	.	.	.	.	.	.	.
12197	C	T	m.12197C>T	-	1	1	0	MT-TH	ENSG00000210176	ENST00000387441.1	60	.	64;II;TS;C;N	non_coding_transcript_exon_variant	MODIFIER	rs28711184	.	.	.	.	.	.	0	0	.	.	0	0	0	0	.	.	0.335	0.66622	0.125984	.	.	.	.	.	.	.	.	.	.	.	.	.	.
12308	A	G	m.12308A>G	-	9	3	9	MT-TL2	ENSG00000210191	ENST00000387456.1	43	.	44;0;VL;A;Y	non_coding_transcript_exon_variant	MODIFIER	rs2853498	CPEO / Stroke / CM / Breast & Renal & Prostate Cancer Risk / Altered brain pH /sCJD	+	+	0.0706	+	+	0.1671	0.183	0.1389	0.1239	0.118815	0.125137	0.393455	0.220601	.	.	4.71	0.570913	0.984252	.	.	.	.	.	.	.	.	.	.	.	.	.	.
12372	G	A	m.12372G>A	-	9	0	9	MT-ND5	ENSG00000198786	ENST00000361567.2	36	L12L	.	synonymous_variant	LOW	rs2853499	Altered brain pH / sCJD patients	+	.	0.0829	+	+	0.169	0.1846	0.1428	0.1344	0.133105	0.143798	0.49943	0.259755	0.0016	0	-9.07	-5.20743	0	.	.	.	.	.	.	.	.	.	.	.	.	.	.
12561	G	A	m.12561G>A	-	2	2	0	MT-ND5	ENSG00000198786	ENST00000361567.2	225	Q75Q	.	synonymous_variant	LOW	rs28759201	.	.	.	0.0074	+	+	0.003	0.0033	0.002	0.0046	0.00494567	0.00373216	0.023394	0.008791	0.0044	0	-9.07	-2.66496	0	.	.	.	.	.	.	.	.	.	.	.	.	.	.
12572	G	A	m.12572G>A	-	2	2	0	MT-ND5	ENSG00000198786	ENST00000361567.2	236	S79N	.	missense_variant	MODERATE	.	.	.	.	0.0004	-	+	0	.	.	.	0	0	8.3e-05	0	0.0019	0	3.7	0.570913	0.015748	tolerated_low_confidence(0.09)	probably_damaging(0.997)	probably_damaging(0.99)	tolerated(0.019)	tolerated(1.46)	medium(2.055)	disease_causing(0.594)	simple_aae	neutral(-1.77)	.	high_pathogenicity(0.762)	.	disease(0.541)	neutral(0.304)
12599	T	C	m.12599T>C	-	1	1	1	MT-ND5	ENSG00000198786	ENST00000361567.2	263	M88T	.	missense_variant	MODERATE	rs1556424129	.	.	.	0.0004	-	+	0.0004	0.0004	.	0.0003	0.000237773	0.00131723	0.001071	0.003003	0.0051	0.0166	1.38	1.03318	0	tolerated_low_confidence(0.13)	benign(0)	benign(0.003)	.	.	.	polymorphism(1)	simple_aae	.	neutral(0.253)	low_pathogenicity(0.41)	neutral(0.431)	neutral(0.455)	neutral(0.301)
12612	A	G	m.12612A>G	-	2	2	2	MT-ND5	ENSG00000198786	ENST00000361567.2	276	V92V	.	synonymous_variant	LOW	rs28359172	.	.	.	0.0201	+	+	0.0671	0.0731	0.0782	0.0504	0.0498609	0.0511526	0.173329	0.100484	0.0022	0.0111	-9.07	-3.35836	0	.	.	.	.	.	.	.	.	.	.	.	.	.	.
12774	C	T	m.12774C>T	-	1	1	1	MT-ND5	ENSG00000198786	ENST00000361567.2	438	G146G	.	synonymous_variant	LOW	.	.	.	.	.	.	.	0.0002	0.0002	.	0.0001	0.000142663	0	0.002553	0.000923	.	.	-9.3	-8.21217	0	.	.	.	.	.	.	.	.	.	.	.	.	.	.
12908	T	A	m.12908T>A	-	1	1	1	MT-ND5	ENSG00000198786	ENST00000361567.2	572	L191Q	.	missense_variant	MODERATE	.	.	.	.	.	.	.	0	0	.	.	0	0	0.000178	0	0.0024	0	-3.8	-0.584756	0	deleterious_low_confidence(0.02)	probably_damaging(0.995)	probably_damaging(0.952)	tolerated(0.054)	tolerated(4.54)	low(1.055)	polymorphism(1)	simple_aae	damaging(-3.18)	deleterious(0.778)	low_pathogenicity(0.459)	disease(0.663)	neutral(0.217)	neutral(0.363)
12976	C	T	m.12976C>T	-	1	1	0	MT-ND5	ENSG00000198786	ENST00000361567.2	640	L214L	.	synonymous_variant	LOW	rs1569484553	.	.	.	.	.	.	0.0004	0.0004	.	0.0006	0.000475545	0.000219539	0.002299	0.000714	.	.	-9	-7.74991	0	.	.	.	.	.	.	.	.	.	.	.	.	.	.
13056	C	T	m.13056C>T	-	2	0	2	MT-ND5	ENSG00000198786	ENST00000361567.2	720	P240P	.	synonymous_variant	LOW	rs1556424208	.	.	.	.	.	.	0.0009	0.001	0.0007	0.0007	0.000546877	0.00219539	0.003408	0.006767	.	.	-9.1	-20	0	.	.	.	.	.	.	.	.	.	.	.	.	.	.
13368	G	A	m.13368G>A	-	4	0	4	MT-ND5	ENSG00000198786	ENST00000361567.2	1032	G344G	.	synonymous_variant	LOW	rs3899498	.	.	.	0.023	+	+	0.0718	0.0785	0.0678	0.0496	0.048458	0.0559824	0.185362	0.103189	0.0025	0.0119	-9.1	-12.1575	0	.	.	.	.	.	.	.	.	.	.	.	.	.	.
13513	G	A	m.13513G>A	-	1	1	0	MT-ND5	ENSG00000198786	ENST00000361567.2	1177	D393N	.	missense_variant	MODERATE	rs267606897	Leigh Disease / MELAS / LHON-MELAS Overlap Syndrome / negative association w Carotid Atherosclerosis	.	+	.	.	.	0.0033	.	0.0033	.	2.37773e-05	0	0.000264	0	0.0025	0.0128	4.55	9.06334	1	deleterious_low_confidence(0)	probably_damaging(0.999)	probably_damaging(0.998)	tolerated(0.408)	tolerated(4.5)	high(4.265)	disease_causing_automatic(1)	simple_aae	damaging(-4.5)	deleterious(0.919)	high_pathogenicity(0.834)	disease(0.824)	disease(0.641)	disease(0.634)
13602	T	C	m.13602T>C	-	1	1	1	MT-ND5	ENSG00000198786	ENST00000361567.2	1266	Y422Y	.	synonymous_variant	LOW	rs386829185	.	.	.	.	.	.	0.001	0.0011	.	0.0012	0.00126019	0.00109769	0.005561	0.003292	0.0027	0	-0.792	-4.31502	0	.	.	.	.	.	.	.	.	.	.	.	.	.	.
13617	T	C	m.13617T>C	-	3	2	2	MT-ND5	ENSG00000198786	ENST00000361567.2	1281	I427I	.	synonymous_variant	LOW	rs2853503	.	.	.	0.0332	+	+	0.0586	0.0641	0.0528	0.0386	0.0363079	0.0513721	0.158225	0.108461	0.0047	0	-8.91	-5.46833	0	.	.	.	.	.	.	.	.	.	.	.	.	.	.
13708	G	A	m.13708G>A	-	2	0	2	MT-ND5	ENSG00000198786	ENST00000361567.2	1372	A458T	.	missense_variant	MODERATE	rs28359178	LHON / Increased MS risk / higher freq in PD-ADS	+	.	0.0466	+	+	0.0873	0.0951	0.1076	0.071	0.0715458	0.0735456	0.286289	0.152541	1	1	-5.73	0.528866	0	tolerated_low_confidence(0.19)	benign(0)	benign(0.001)	tolerated(0.03)	tolerated(1.25)	low(1.6)	polymorphism(1)	simple_aae	neutral(-1.5)	neutral(0.050)	low_pathogenicity(0.409)	disease(0.627)	neutral(0.407)	neutral(0.382)
13722	A	G	m.13722A>G	-	1	1	1	MT-ND5	ENSG00000198786	ENST00000361567.2	1386	L462L	.	synonymous_variant	LOW	rs386829190	.	.	.	.	.	.	0.0088	0.0097	0.0183	0.0076	0.00753739	0.00768386	0.029867	0.014181	0	0.0059	-8.91	-7.77494	0	.	.	.	.	.	.	.	.	.	.	.	.	.	.
13843	G	A	m.13843G>A	-	1	1	0	MT-ND5	ENSG00000198786	ENST00000361567.2	1507	D503N	.	missense_variant	MODERATE	.	.	.	.	.	.	.	.	.	.	.	0	0	0	0	0.0001	0.0005	4.45	4.21945	1	deleterious_low_confidence(0)	probably_damaging(1)	probably_damaging(0.998)	tolerated(0.036)	tolerated(1.59)	medium(2.91)	polymorphism(0.567)	simple_aae	neutral(-2)	deleterious(0.919)	low_pathogenicity(0.503)	neutral(0.426)	neutral(0.416)	neutral(0.25)
13934	C	T	m.13934C>T	-	1	0	1	MT-ND5	ENSG00000198786	ENST00000361567.2	1598	T533M	.	missense_variant	MODERATE	rs193302971	.	.	.	0.0066	+	+	0.0164	0.0179	0.0163	0.012	0.0124355	0.0107574	0.053435	0.025965	0.2186	0.1902	-3.03	0.0675433	0	tolerated_low_confidence(0.9)	benign(0.026)	benign(0.02)	tolerated(0.003)	tolerated(1.6)	neutral(-0.34)	polymorphism(1)	simple_aae	neutral(1.26)	neutral(0.001)	low_pathogenicity(0.446)	neutral(0.322)	neutral(0.159)	neutral(0.06)
13996	G	A	m.13996G>A	-	1	1	0	MT-ND5	ENSG00000198786	ENST00000361567.2	1660	D554N	.	missense_variant	MODERATE	.	.	.	.	.	.	.	.	.	.	.	0	0	0	0	0.0018	0.0069	4.45	9.06334	1	deleterious_low_confidence(0)	probably_damaging(1)	probably_damaging(0.998)	tolerated(0.191)	tolerated(-0.08)	high(4.555)	disease_causing(0.705)	simple_aae	damaging(-4.41)	deleterious(0.919)	high_pathogenicity(0.787)	disease(0.616)	neutral(0.386)	neutral(0.322)
14037	A	G	m.14037A>G	-	1	0	1	MT-ND5	ENSG00000198786	ENST00000361567.2	1701	S567S	.	synonymous_variant	LOW	rs879181324	.	.	.	.	.	.	0.0031	0.0034	0.002	0.0017	0.00166441	0.00153677	0.007151	0.003023	.	.	-6.9	-7.31362	0	.	.	.	.	.	.	.	.	.	.	.	.	.	.
14053	A	G	m.14053A>G	-	3	3	3	MT-ND5	ENSG00000198786	ENST00000361567.2	1717	T573A	.	missense_variant	MODERATE	rs200134839	.	.	.	0.007	+	+	0.0035	0.0038	0.0046	0.0045	0.00496945	0.00285401	0.020384	0.006931	0.0704	0.0402	-1.57	-3.39238	0	tolerated_low_confidence(1)	benign(0)	benign(0)	tolerated(0.012)	tolerated(1.68)	neutral(-1.35)	polymorphism(1)	simple_aae	neutral(1.83)	neutral(0.000)	low_pathogenicity(0.409)	neutral(0.278)	neutral(0.147)	neutral(0.028)
14129	C	T	m.14129C>T	-	1	1	0	MT-ND5	ENSG00000198786	ENST00000361567.2	1793	T598I	.	missense_variant	MODERATE	rs879039557	.	.	.	.	.	.	0.0005	0.0005	.	0.0016	0.00168819	0.000658617	0.009781	0.001959	0.0647	0.077	-7.58	-2.46973	0	tolerated_low_confidence(0.44)	benign(0.387)	possibly_damaging(0.483)	tolerated(0.032)	tolerated(1.74)	neutral(-0.145)	polymorphism(1)	simple_aae	neutral(-1.38)	neutral(0.173)	low_pathogenicity(0.666)	neutral(0.46)	neutral(0.132)	neutral(0.068)
14133	A	G	m.14133A>G	-	1	0	1	MT-ND5	ENSG00000198786	ENST00000361567.2	1797	L599L	.	synonymous_variant	LOW	rs879100848	.	.	.	.	.	.	0.0092	0.0101	0.0183	0.0093	0.00958223	0.00965971	0.037596	0.01806	.	.	-8.43	-7.54428	0	.	.	.	.	.	.	.	.	.	.	.	.	.	.
14139	A	G	m.14139A>G	-	1	1	1	MT-ND5	ENSG00000198786	ENST00000361567.2	1803	L601L	.	synonymous_variant	LOW	rs878918283	.	.	.	.	.	.	0.0064	0.0069	0.0104	0.0063	0.00596809	0.00636663	0.02737	0.013541	.	.	-7.24	-3.39238	0	.	.	.	.	.	.	.	.	.	.	.	.	.	.
14167	C	T	m.14167C>T	-	6	1	5	MT-ND6	ENSG00000198695	ENST00000361681.2	507	E169E	.	synonymous_variant	LOW	rs193302977	.	.	.	.	.	.	0.0608	0.0663	0.0645	0.0379	0.0390423	0.0318332	0.15256	0.059035	0.0095	0.0358	-7.23	-0.624441	0	.	.	.	.	.	.	.	.	.	.	.	.	.	.
14182	T	C	m.14182T>C	-	3	1	2	MT-ND6	ENSG00000198695	ENST00000361681.2	492	V164V	.	synonymous_variant	LOW	rs372515139	.	.	.	0.0203	+	+	0.0309	0.0338	0.0241	0.0256	0.0252277	0.0197585	0.087515	0.043171	0.0028	0.0246	-8.09	-0.624441	0	.	.	.	.	.	.	.	.	.	.	.	.	.	.
14185	A	G	m.14185A>G	-	1	1	1	MT-ND6	ENSG00000198695	ENST00000361681.2	489	G163G	.	synonymous_variant	LOW	.	.	.	.	.	.	.	0.0001	0.0001	.	0.0001	0.000166441	0	0.00349	0.005202	.	.	-4.12	-1.08576	0	.	.	.	.	.	.	.	.	.	.	.	.	.	.
14198	G	A	m.14198G>A	-	1	0	1	MT-ND6	ENSG00000198695	ENST00000361681.2	476	T159M	.	missense_variant	MODERATE	.	.	.	.	0.0008	+	-	0.0011	0.0011	0.0013	0.001	0.000832204	0.00153677	0.003694	0.004117	0.0384	0.3508	1.33	0.298205	0	tolerated(0.08)	probably_damaging(0.999)	probably_damaging(0.969)	tolerated(0.494)	tolerated(1.7)	neutral(0.26)	.	.	damaging(-2.84)	deleterious(0.712)	high_pathogenicity(0.751)	neutral(0.315)	neutral(0.119)	neutral(0.188)
14233	A	G	m.14233A>G	-	5	1	5	MT-ND6	ENSG00000198695	ENST00000361681.2	441	D147D	.	synonymous_variant	LOW	rs3915611	.	.	.	0.0168	+	+	0.0551	0.0602	0.0613	0.037	0.0351666	0.0401756	0.123147	0.078688	0.0042	0.0317	0.889	-0.163118	0	.	.	.	.	.	.	.	.	.	.	.	.	.	.
14279	G	A	m.14279G>A	-	2	2	0	MT-ND6	ENSG00000198695	ENST00000361681.2	395	S132L	.	missense_variant	MODERATE	rs869025187	LHON	+	.	0.0004	-	+	0.0002	0.0002	.	0.0001	7.13318e-05	0.000658617	0.000826	0.001356	0.0755	0.1832	1.33	0.298205	0	tolerated(0.66)	benign(0.001)	benign(0.011)	tolerated(0.175)	tolerated(1.63)	neutral(0.26)	polymorphism(1)	without_aae	neutral(-0.21)	neutral(0.003)	low_pathogenicity(0.396)	neutral(0.338)	neutral(0.162)	neutral(0.469)
14365	C	T	m.14365C>T	-	1	0	1	MT-ND6	ENSG00000198695	ENST00000361681.2	309	V103V	.	synonymous_variant	LOW	rs2853815	.	.	.	.	.	.	0.0094	0.0103	0.0065	0.0047	0.00468412	0.00461032	0.026833	0.019069	.	.	-5.06	-3.63478	0	.	.	.	.	.	.	.	.	.	.	.	.	.	.
14465	G	A	m.14465G>A	-	2	2	0	MT-ND6	ENSG00000198695	ENST00000361681.2	209	T70I	.	missense_variant	MODERATE	.	.	.	.	.	.	.	.	.	.	.	0	0	0	0	0.0008	0.0219	4.05	4.20209	1	deleterious(0)	probably_damaging(1)	probably_damaging(1)	damaging(0.764)	tolerated(2.4)	medium(3.065)	disease_causing(1)	without_aae	damaging(-5.98)	deleterious(0.945)	low_pathogenicity(0.698)	disease(0.632)	disease(0.552)	disease(0.826)
14484	T	C	m.14484T>C	-	1	1	1	MT-ND6	ENSG00000198695	ENST00000361681.2	190	M64V	.	missense_variant	MODERATE	rs199476104	LHON	+	+	.	.	.	0.0009	0.0009	0.0013	.	0.000641986	0.00592755	0.003136	0.01149	0.0203	0.698	-8.09	-1.56032	0	deleterious(0.02)	probably_damaging(0.993)	probably_damaging(0.99)	tolerated(0.392)	tolerated(2.26)	medium(2.535)	polymorphism(0.936)	simple_aae	neutral(-1.97)	deleterious(0.825)	low_pathogenicity(0.627)	neutral(0.233)	disease(0.641)	disease(0.703)
14530	T	C	m.14530T>C	-	1	1	1	MT-ND6	ENSG00000198695	ENST00000361681.2	144	G48G	.	synonymous_variant	LOW	rs878975885	.	.	.	.	.	.	0.0014	0.0014	0.002	0.0009	0.000903536	0.000219539	0.005653	0.0005	.	.	-8.09	-11.9326	0	.	.	.	.	.	.	.	.	.	.	.	.	.	.
14544	G	A	m.14544G>A	-	2	0	2	MT-ND6	ENSG00000198695	ENST00000361681.2	130	L44L	.	synonymous_variant	LOW	rs371485573	.	.	.	.	.	.	0.002	0.0021	0.0013	0.0025	0.00271061	0.00153677	0.012362	0.003624	.	.	-7.87	-1.79081	0	.	.	.	.	.	.	.	.	.	.	.	.	.	.
14582	A	G	m.14582A>G	-	1	0	1	MT-ND6	ENSG00000198695	ENST00000361681.2	92	V31A	.	missense_variant	MODERATE	rs41354845	LHON synergistic combo 14258A + 14582G	+	.	0.0033	+	+	0.0098	0.0108	0.0065	0.005	0.005017	0.00570801	0.027322	0.014488	0.1934	0.642	-1.61	0.51415	0	tolerated(0.44)	benign(0.003)	benign(0.011)	tolerated(0.188)	tolerated(2.23)	neutral(-0.63)	polymorphism(1)	without_aae	neutral(1.87)	neutral(0.013)	low_pathogenicity(0.452)	neutral(0.202)	neutral(0.498)	neutral(0.2)
14749	G	A	m.14749G>A	-	1	1	0	MT-CYB	ENSG00000198727	ENST00000361789.2	3	M1M	.	synonymous_variant	LOW	.	.	.	.	.	.	.	.	.	.	.	0	0	9.7e-05	0	.	.	4.15	8.81201	1	.	.	.	.	.	.	.	.	.	.	.	.	.	.
14766	C	T	m.14766C>T	+	16	0	16	MT-CYB	ENSG00000198727	ENST00000361789.2	20	T7I	.	missense_variant	MODERATE	rs193302980	.	.	.	.	.	.	0.5691	0.6276	0.5678	0.7698	0.780322	0.676839	0.84262	0.494623	.	.	1.98	0.0531575	0	deleterious_low_confidence(0.04)	benign(0.001)	benign(0.003)	.	.	.	.	.	.	neutral(0.349)	low_pathogenicity(0.165)	neutral(0.17)	neutral(0.319)	neutral(0.074)
14798	T	C	m.14798T>C	-	4	3	4	MT-CYB	ENSG00000198727	ENST00000361789.2	52	F18L	.	missense_variant	MODERATE	rs28357681	.	.	.	0.0262	+	+	0.1055	0.1149	0.1167	0.0644	0.0649832	0.06191	0.257294	0.122431	0.4887	0.3326	-0.392	-1.56032	0	tolerated_low_confidence(0.44)	benign(0)	benign(0)	.	.	.	.	.	.	neutral(0.013)	low_pathogenicity(0.609)	neutral(0.148)	neutral(0.135)	neutral(0.046)
14826	T	C	m.14826T>C	-	1	1	1	MT-CYB	ENSG00000198727	ENST00000361789.2	80	I27T	.	missense_variant	MODERATE	.	.	.	.	0.0004	-	+	0.0001	0.0001	.	0	2.37773e-05	0	9.5e-05	0	0.0013	0.0013	4.15	3.74109	1	deleterious_low_confidence(0)	probably_damaging(0.997)	probably_damaging(0.994)	.	.	.	.	.	.	deleterious(0.879)	high_pathogenicity(0.851)	disease(0.775)	neutral(0.285)	disease(0.641)
14905	G	A	m.14905G>A	-	5	0	5	MT-CYB	ENSG00000198727	ENST00000361789.2	159	M53M	.	synonymous_variant	LOW	rs193302983	.	.	.	0.0556	+	+	0.0733	0.0808	0.088	0.0523	0.0526191	0.0542261	0.201653	0.103545	0.0057	0.0075	-0.329	-0.407835	0.212598	.	.	.	.	.	.	.	.	.	.	.	.	.	.
15024	G	A	m.15024G>A	-	1	1	0	MT-CYB	ENSG00000198727	ENST00000361789.2	278	C93Y	.	missense_variant	MODERATE	.	Possible DEAF modifier	+	.	0.0021	+	-	0.0003	0.0003	0.0007	0.0006	0.000570654	0.00197585	0.004286	0.008131	0.0047	0.0168	3.31	4.20209	1	deleterious_low_confidence(0)	probably_damaging(1)	probably_damaging(1)	.	.	.	.	.	.	deleterious(0.945)	low_pathogenicity(0.642)	disease(0.662)	disease(0.715)	disease(0.856)
15110	G	A	m.15110G>A	-	1	0	1	MT-CYB	ENSG00000198727	ENST00000361789.2	364	A122T	.	missense_variant	MODERATE	rs28357685	.	.	.	0.0283	+	+	0.0077	0.0082	0.0111	0.0086	0.00936824	0.00856202	0.031347	0.01639	0.067	0.0238	-6.93	-3.40428	0	tolerated_low_confidence(0.69)	benign(0)	benign(0.005)	.	.	.	.	.	.	neutral(0.003)	low_pathogenicity(0.441)	neutral(0.157)	neutral(0.241)	neutral(0.099)
15196	A	G	m.15196A>G	-	1	1	1	MT-CYB	ENSG00000198727	ENST00000361789.2	450	L150L	.	synonymous_variant	LOW	.	.	.	.	.	.	.	0.0001	0.0001	0.0007	0.0001	0.000118886	0.000219539	0.000475	0.000682	.	.	-8.3	-7.78371	0	.	.	.	.	.	.	.	.	.	.	.	.	.	.
15218	A	G	m.15218A>G	-	1	1	1	MT-CYB	ENSG00000198727	ENST00000361789.2	472	T158A	.	missense_variant	MODERATE	rs2853506	.	.	.	0.0123	+	+	0.0261	0.0285	0.0248	0.0173	0.0156692	0.0287596	0.07404	0.061916	0.1043	0.132	1.02	1.20564	0	tolerated_low_confidence(0.07)	possibly_damaging(0.833)	probably_damaging(0.956)	.	.	.	.	.	.	deleterious(0.733)	low_pathogenicity(0.366)	.	neutral(0.312)	neutral(0.316)
15257	G	A	m.15257G>A	-	1	0	1	MT-CYB	ENSG00000198727	ENST00000361789.2	511	D171N	.	missense_variant	MODERATE	rs41518645	LHON	+	.	0.0033	+	+	0.0165	0.018	0.0313	0.0152	0.0155028	0.0118551	0.059749	0.021711	0.1005	0.0754	3.34	6.04606	1	deleterious_low_confidence(0.01)	benign(0.001)	benign(0.005)	.	.	.	.	.	.	neutral(0.406)	high_pathogenicity(0.785)	neutral(0.342)	disease(0.506)	neutral(0.352)
15301	G	A	m.15301G>A	-	1	0	1	MT-CYB	ENSG00000198727	ENST00000361789.2	555	L185L	.	synonymous_variant	LOW	rs193302991	.	.	.	0.3333	+	+	0.1389	0.1386	0.103	0.2873	0.295979	0.254007	0.811181	0.364917	0.0063	0.0068	-8.3	-14.9291	0	.	.	.	.	.	.	.	.	.	.	.	.	.	.
15326	A	G	m.15326A>G	+	27	15	27	MT-CYB	ENSG00000198727	ENST00000361789.2	580	T194A	.	missense_variant	MODERATE	rs2853508	.	.	.	.	.	.	0.9792	0.9817	0.8462	0.9868	0.930166	0.968167	0.029095	0.065591	.	.	-8.04	-5.47875	0	tolerated_low_confidence(0.28)	benign(0)	benign(0.009)	.	.	.	.	.	.	neutral(0.032)	low_pathogenicity(0.452)	neutral(0.294)	neutral(0.244)	neutral(0.049)
15355	G	A	m.15355G>A	-	3	1	2	MT-CYB	ENSG00000198727	ENST00000361789.2	609	T203T	.	synonymous_variant	LOW	rs527236181	.	.	.	0.0045	+	+	0.0032	0.0034	0.0026	0.0032	0.00304349	0.00461032	0.012583	0.011463	0.0007	0	-8.3	-2.7128	0	.	.	.	.	.	.	.	.	.	.	.	.	.	.
15452	C	A	m.15452C>A	-	7	0	7	MT-CYB	ENSG00000198727	ENST00000361789.2	706	L236I	.	missense_variant	MODERATE	rs193302994	.	.	.	0.038	+	+	0.1379	0.1506	0.1571	0.0929	0.0921606	0.101427	0.674881	0.368259	0.4527	0.3823	-7.88	-2.70689	0	tolerated_low_confidence(0.51)	benign(0.029)	benign(0.244)	.	.	.	.	.	.	neutral(0.033)	low_pathogenicity(0.098)	neutral(0.357)	neutral(0.261)	neutral(0.043)
15454	T	C	m.15454T>C	-	1	1	1	MT-CYB	ENSG00000198727	ENST00000361789.2	708	L236L	.	synonymous_variant	LOW	rs879015290	.	.	.	.	.	.	0.0076	0.0082	0.0137	0.0078	0.00777516	0.00702525	0.03487	0.014543	.	.	-7.88	-9.85471	0	.	.	.	.	.	.	.	.	.	.	.	.	.	.
15474	C	T	m.15474C>T	-	1	1	0	MT-CYB	ENSG00000198727	ENST00000361789.2	728	T243M	.	missense_variant	MODERATE	.	.	.	.	.	.	.	0	0	.	.	0	0	0	0	0.0006	0.001	0.523	0.290583	0	deleterious_low_confidence(0.02)	possibly_damaging(0.613)	possibly_damaging(0.663)	.	.	.	.	.	.	deleterious(0.617)	low_pathogenicity(0.283)	neutral(0.404)	neutral(0.208)	neutral(0.142)
15508	C	T	m.15508C>T	-	1	1	0	MT-CYB	ENSG00000198727	ENST00000361789.2	762	D254D	.	synonymous_variant	LOW	rs3134743	.	.	.	0.0025	+	-	0.0021	0.0022	0.0007	0.0033	0.00309104	0.00746432	0.012931	0.013821	0.0018	0.0035	-6.4	-2.93746	0	.	.	.	.	.	.	.	.	.	.	.	.	.	.
15607	A	G	m.15607A>G	-	5	2	5	MT-CYB	ENSG00000198727	ENST00000361789.2	861	K287K	.	synonymous_variant	LOW	rs193302996	.	.	.	0.0214	+	+	0.0719	0.0786	0.0737	0.0511	0.0501938	0.0542261	0.1899	0.101812	0.0002	0.0018	3.94	4.6715	1	.	.	.	.	.	.	.	.	.	.	.	.	.	.
15721	T	C	m.15721T>C	-	3	2	2	MT-CYB	ENSG00000198727	ENST00000361789.2	975	Y325Y	.	synonymous_variant	LOW	rs879011405	.	.	.	0.0017	+	+	0.0033	0.0036	0.0007	0.0032	0.00340015	0.00131723	0.012526	0.003927	0.0125	0.0019	-0.675	-0.401142	0.433071	.	.	.	.	.	.	.	.	.	.	.	.	.	.
15748	T	C	m.15748T>C	-	1	1	0	MT-CYB	ENSG00000198727	ENST00000361789.2	1002	I334I	.	synonymous_variant	LOW	.	.	.	.	0.0012	+	+	0.0003	0.0003	.	0.0006	0.000570654	0	0.003014	0	0.1407	0.0053	-7.88	-6.39609	0	.	.	.	.	.	.	.	.	.	.	.	.	.	.
15856	C	T	m.15856C>T	-	1	1	0	MT-CYB	ENSG00000198727	ENST00000361789.2	1110	S370S	.	synonymous_variant	LOW	.	.	.	.	.	.	.	0.0001	0.0001	.	0.0001	9.5109e-05	0.000219539	0.00048	0.000409	.	.	-7.46	-6.39609	0	.	.	.	.	.	.	.	.	.	.	.	.	.	.
15884	G	C	m.15884G>C	-	1	0	1	MT-CYB	ENSG00000198727	ENST00000361789.2	1138	A380P	.	missense_variant	MODERATE	rs527236195	.	.	.	0.0082	+	+	0.0139	0.0152	0.0156	0.0111	0.0108662	0.011416	0.124047	0.060293	0.1681	0.1045	-2.53	-0.170567	0	deleterious_low_confidence(0.03)	possibly_damaging(0.930)	possibly_damaging(0.675)	.	.	.	.	.	.	deleterious(0.604)	low_pathogenicity(0.29)	.	.	.
15892	T	C	m.15892T>C	-	1	1	1	MT-TT	ENSG00000210195	ENST00000387460.2	5	.	5;II;AS;U;N	non_coding_transcript_exon_variant	MODIFIER	rs1556424683	.	.	.	.	.	.	0.0003	0.0003	.	0.0002	0.000237773	0	0.001285	0	.	.	-7.88	-1.32344	0	.	.	.	.	.	.	.	.	.	.	.	.	.	.
15928	G	A	m.15928G>A	-	5	0	5	MT-TT	ENSG00000210195	ENST00000387460.2	41	.	43;II;CS;G;N	non_coding_transcript_exon_variant	MODIFIER	rs527236198	Multiple Sclerosis / idiopathic repeat miscarriage / AD protection	+	.	0.0234	+	+	0.0719	0.079	0.0548	0.0488	0.0466272	0.0564215	0.161302	0.104133	.	.	-5.88	-1.32344	0	.	.	.	.	.	.	.	.	.	.	.	.	.	.
15939	CT	C	m.15940_15940delT	-	1	0	1	MT-TT	ENSG00000210195	ENST00000387460.2	53	.	56;II;TL;U;N	non_coding_transcript_exon_variant	MODIFIER	.	.	.	.	0.0202	-	+	0.0053	0.0056	.	.	0.069834	0.005708	0.006768	0.007242	0	0	-7.24	-5.47379	0	.	.	.	.	.	.	.	.	.	.	.	.	.	.
16021	C	T	m.16021C>T	-	1	1	0	MT-TP	ENSG00000210196	ENST00000387461.2	3	.	3;II;AS;G;N	non_coding_transcript_exon_variant	MODIFIER	.	.	.	.	.	.	.	0	0	.	0	0	0	2e-06	0	.	.	-1.08	-0.862291	0	.	.	.	.	.	.	.	.	.	.	.	.	.	.
16060	G	A	m.16060G>A	-	1	1	0	MT-DLOOP	.	.	.	.	.	intergenic_variant	MODIFIER	.	.	.	.	.	.	.	0	0	.	0	.	.	.	.	.	.	-3.48	0.521158	0	.	.	.	.	.	.	.	.	.	.	.	.	.	.
16067	C	T	m.16067C>T	-	1	0	1	MT-DLOOP	.	.	.	.	.	intergenic_variant	MODIFIER	rs1556424732	.	.	.	.	.	.	0.003	0.0033	0.0052	0.0036	0.00316237	0.00439078	0.014609	0.011655	.	.	-1.8	-1.32344	0	.	.	.	.	.	.	.	.	.	.	.	.	.	.
16069	C	T	m.16069C>T	-	2	0	2	MT-DLOOP	.	.	.	.	.	intergenic_variant	MODIFIER	rs147903261	.	.	.	0.0194	+	+	0.0681	0.0743	0.0789	0.0493	0.0500273	0.0482986	0.17208	0.095967	.	.	-1.89	-2.24574	0	.	.	.	.	.	.	.	.	.	.	.	.	.	.
16093	T	C	m.16093T>C	-	2	2	2	MT-DLOOP	.	.	.	.	.	intergenic_variant	MODIFIER	rs2853511	Cyclic Vomiting Syndrome	.	+	0.0567	+	+	0.0507	0.0551	0.0378	0.0572	0.0596096	0.0432492	0.273068	0.109948	.	.	-5.24	-4.09034	0	.	.	.	.	.	.	.	.	.	.	.	.	.	.
16094	T	C	m.16094T>C	-	2	2	1	MT-DLOOP	.	.	.	.	.	intergenic_variant	MODIFIER	rs1556424743	.	.	.	.	.	.	0.0004	0.0004	0.002	0.0005	0.0005231	0.000439078	0.002409	0.001288	.	.	2.68	-0.401142	0	.	.	.	.	.	.	.	.	.	.	.	.	.	.
16126	T	C	m.16126T>C	-	7	2	7	MT-DLOOP	.	.	.	.	.	intergenic_variant	MODIFIER	rs147029798	.	.	.	0.0797	+	+	0.1476	0.1611	0.1597	0.112	0.116366	0.116136	0.420633	0.210009	.	.	-3.74	-0.631717	0	.	.	.	.	.	.	.	.	.	.	.	.	.	.
16129	G	A	m.16129G>A	+	1	0	1	MT-DLOOP	.	.	.	.	.	intergenic_variant	MODIFIER	rs41534744	Cyclic Vomiting Syndrome with Migraine	.	+	.	.	.	0.0821	0.0892	0.0737	0.1316	0.13339	0.110867	0.523815	0.253622	.	.	-2.44	-2.70689	0	.	.	.	.	.	.	.	.	.	.	.	.	.	.
16145	G	A	m.16145G>A	-	1	0	1	MT-DLOOP	.	.	.	.	.	intergenic_variant	MODIFIER	rs41419246	.	.	.	0.0226	+	+	0.0301	0.0327	0.0463	0.0286	0.0292698	0.0239297	0.102697	0.043517	.	.	-4.25	-1.32344	0	.	.	.	.	.	.	.	.	.	.	.	.	.	.
16150	C	T	m.16150C>T	-	1	0	1	MT-DLOOP	.	.	.	.	.	intergenic_variant	MODIFIER	rs879004379	.	.	.	.	.	.	0.0013	0.0014	.	0.002	0.00199729	0.00109769	0.008151	0.002777	.	.	-1.26	-0.170567	0	.	.	.	.	.	.	.	.	.	.	.	.	.	.
16157	T	C	m.16157T>C	-	1	1	1	MT-DLOOP	.	.	.	.	.	intergenic_variant	MODIFIER	rs386829276	.	.	.	.	.	.	0.001	0.001	.	0.0019	0.00164063	0.00175631	0.0066	0.004408	.	.	-4.91	-0.401142	0	.	.	.	.	.	.	.	.	.	.	.	.	.	.
16179	CA	C	m.16180_16180delA	-	1	1	0	MT-DLOOP	.	.	.	.	.	intergenic_variant	MODIFIER	.	.	.	.	.	.	.	0.0162	0.0178	.	0	0.0654826	0.00526894	0.003806	0.001093	.	.	0.988	-1.55402	0	.	.	.	.	.	.	.	.	.	.	.	.	.	.
16182	A	AC	m.16182_16183insC	-	2	2	1	MT-DLOOP	.	.	.	.	.	intergenic_variant	MODIFIER	rs1556424784	.	.	.	.	.	.	0.0358	0.0359	0.0052	0.0002	.	.	.	.	.	.	-2.98	0.0600079	0	.	.	.	.	.	.	.	.	.	.	.	.	.	.
16183	A	AC	m.16183_16184insC	-	2	1	1	MT-DLOOP	.	.	.	.	.	intergenic_variant	MODIFIER	rs879109683	.	.	.	.	.	.	0.0092	0.0103	0.0046	0	.	.	.	.	.	.	0	-1.09287	0	.	.	.	.	.	.	.	.	.	.	.	.	.	.
16183	A	C	m.16183A>C	-	2	1	2	MT-DLOOP	.	.	.	.	.	intergenic_variant	MODIFIER	rs28671493	Melanoma patients	.	.	0.0869	+	+	0.0763	0.0767	0.0007	0.1358	0.131821	0.10472	0.91741	0.414015	.	.	0	-1.09287	0	.	.	.	.	.	.	.	.	.	.	.	.	.	.
16189	T	C	m.16189T>C	+	5	4	4	MT-DLOOP	.	.	.	.	.	intergenic_variant	MODIFIER	rs28693675	Diabetes / Cardiomyopathy /cancer risk / mtDNA copy nbr / Metabolic Syndrome / Melanoma patients	+	.	.	.	.	0.1807	0.1824	0.0098	0.2587	0.256485	0.212294	0.703633	0.384377	.	.	-3.62	-12.391	0	.	.	.	.	.	.	.	.	.	.	.	.	.	.
16192	C	T	m.16192C>T	-	1	0	1	MT-DLOOP	.	.	.	.	.	intergenic_variant	MODIFIER	rs879025248	Melanoma patients	.	.	0.0488	+	+	0.0476	0.0479	0.0424	0.0418	0.0393038	0.042371	0.151398	0.097155	.	.	2.39	-0.862291	0	.	.	.	.	.	.	.	.	.	.	.	.	.	.
16222	C	T	m.16222C>T	-	1	0	1	MT-DLOOP	.	.	.	.	.	intergenic_variant	MODIFIER	rs386829282	.	.	.	.	.	.	0.0117	0.0128	0.0183	0.008	0.0081556	0.00636663	0.03267	0.01414	.	.	0	-7.08781	0	.	.	.	.	.	.	.	.	.	.	.	.	.	.
16224	T	C	m.16224T>C	-	3	2	3	MT-DLOOP	.	.	.	.	.	intergenic_variant	MODIFIER	rs386420031	.	.	.	0.0148	+	+	0.0633	0.0692	0.0665	0.042	0.0429417	0.036663	0.1506	0.066705	.	.	0	-2.01517	0	.	.	.	.	.	.	.	.	.	.	.	.	.	.
16231	T	C	m.16231T>C	-	1	1	1	MT-DLOOP	.	.	.	.	.	intergenic_variant	MODIFIER	rs386829286	.	.	.	.	.	.	0.0094	0.0102	0.0183	0.009	0.00872625	0.0105379	0.03117	0.020073	.	.	-3.71	-0.401142	0	.	.	.	.	.	.	.	.	.	.	.	.	.	.
16234	C	T	m.16234C>T	-	3	1	2	MT-DLOOP	.	.	.	.	.	intergenic_variant	MODIFIER	rs368259300	.	.	.	0.0152	+	+	0.0188	0.0206	0.0196	0.0319	0.0281998	0.0232711	0.092249	0.046447	.	.	2.48	-4.78206	0	.	.	.	.	.	.	.	.	.	.	.	.	.	.
16239	C	T	m.16239C>T	-	1	0	1	MT-DLOOP	.	.	.	.	.	intergenic_variant	MODIFIER	rs386829287	.	.	.	.	.	.	0.01	0.0108	0.0098	0.0097	0.00989134	0.00680571	0.044631	0.020441	.	.	1.86	-6.62666	0	.	.	.	.	.	.	.	.	.	.	.	.	.	.
16257	C	T	m.16257C>T	-	2	1	1	MT-DLOOP	.	.	.	.	.	intergenic_variant	MODIFIER	rs376682258	.	.	.	.	.	.	0.0018	0.002	0.0013	0.0019	0.00194973	0	0.042649	0.073168	.	.	0	-3.62919	0	.	.	.	.	.	.	.	.	.	.	.	.	.	.
16261	C	T	m.16261C>T	-	1	0	1	MT-DLOOP	.	.	.	.	.	intergenic_variant	MODIFIER	rs138126107	.	.	.	0.0331	+	+	0.044	0.0478	0.0528	0.0745	0.0753739	0.0529089	0.294562	0.120364	.	.	-3.07	-1.55402	0	.	.	.	.	.	.	.	.	.	.	.	.	.	.
16270	C	T	m.16270C>T	-	4	1	4	MT-DLOOP	.	.	.	.	.	intergenic_variant	MODIFIER	rs2857290	Melanoma patients	.	.	0.0562	+	+	0.0638	0.0696	0.06	0.0462	0.0460565	0.0522503	0.164397	0.110912	.	.	-1.95	-4.32091	0	.	.	.	.	.	.	.	.	.	.	.	.	.	.
16274	G	A	m.16274G>A	-	1	1	0	MT-DLOOP	.	.	.	.	.	intergenic_variant	MODIFIER	rs144095641	.	.	.	0.0197	+	+	0.0132	0.0143	0.0111	0.0245	0.0224695	0.0204171	0.081193	0.049579	.	.	-2.34	-4.78206	0	.	.	.	.	.	.	.	.	.	.	.	.	.	.
16278	C	T	m.16278C>T	+	1	0	1	MT-DLOOP	.	.	.	.	.	intergenic_variant	MODIFIER	rs41458645	.	.	.	.	.	.	0.065	0.0707	0.0743	0.1033	0.113322	0.0599341	0.303288	0.114787	.	.	-2.34	-0.401142	0	.	.	.	.	.	.	.	.	.	.	.	.	.	.
16292	C	T	m.16292C>T	-	2	0	2	MT-DLOOP	.	.	.	.	.	intergenic_variant	MODIFIER	rs144417390	.	.	.	0.0253	+	+	0.0239	0.0254	0.0215	0.0249	0.0241339	0.0210757	0.095606	0.046566	.	.	-3.99	-2.70689	0	.	.	.	.	.	.	.	.	.	.	.	.	.	.
16294	C	T	m.16294C>T	-	4	0	4	MT-DLOOP	.	.	.	.	.	intergenic_variant	MODIFIER	rs140662392	.	.	.	0.0852	+	+	0.0937	0.1029	0.0665	0.0922	0.0951566	0.0792536	0.277662	0.146309	.	.	-0.756	-4.78206	0	.	.	.	.	.	.	.	.	.	.	.	.	.	.
16296	C	T	m.16296C>T	-	2	0	2	MT-DLOOP	.	.	.	.	.	intergenic_variant	MODIFIER	rs879138789	.	.	.	.	.	.	0.0357	0.0395	0.013	0.0228	0.0221128	0.0270033	0.080197	0.055743	.	.	-5.88	-0.862291	0	.	.	.	.	.	.	.	.	.	.	.	.	.	.
16304	T	C	m.16304T>C	-	3	1	3	MT-DLOOP	.	.	.	.	.	intergenic_variant	MODIFIER	rs386829305	.	.	.	0.0626	+	+	0.0722	0.0794	0.0424	0.0751	0.0593956	0.0915477	0.255039	0.209285	.	.	-5.55	-2.01517	0	.	.	.	.	.	.	.	.	.	.	.	.	.	.
16311	T	C	m.16311T>C	+	5	3	4	MT-DLOOP	.	.	.	.	.	intergenic_variant	MODIFIER	rs34799580	.	.	.	.	.	.	0.1626	0.1776	0.1643	0.1976	0.197375	0.148628	0.552226	0.287867	.	.	-6.7	-1.78459	0	.	.	.	.	.	.	.	.	.	.	.	.	.	.
16318	A	G	m.16318A>G	-	1	1	1	MT-DLOOP	.	.	.	.	.	intergenic_variant	MODIFIER	rs879067317	.	.	.	0.0037	+	+	0.0011	0.0012	0.0013	0.002	0.00206862	0.000658617	0.095627	0.033304	.	.	-6.91	-4.55149	0	.	.	.	.	.	.	.	.	.	.	.	.	.	.
16324	T	C	m.16324T>C	-	3	2	3	MT-DLOOP	.	.	.	.	.	intergenic_variant	MODIFIER	rs1556424863	.	.	.	0.0045	+	+	0.0074	0.0081	0.0039	0.0084	0.0076325	0.0149286	0.029034	0.029144	.	.	-6.91	-0.170567	0	.	.	.	.	.	.	.	.	.	.	.	.	.	.
16343	A	G	m.16343A>G	-	1	1	1	MT-DLOOP	.	.	.	.	.	intergenic_variant	MODIFIER	rs374065731	.	.	.	.	.	.	0.0079	0.0085	0.0104	0.0104	0.0100102	0.00702525	0.046052	0.017112	.	.	-6.91	-3.39861	0	.	.	.	.	.	.	.	.	.	.	.	.	.	.
16362	T	C	m.16362T>C	-	3	2	3	MT-DLOOP	.	.	.	.	.	intergenic_variant	MODIFIER	rs62581341	.	.	.	0.185	+	+	0.1306	0.1399	0.0743	0.1738	0.174145	0.210538	0.641484	0.353316	.	.	-0.301	-1.32344	0	.	.	.	.	.	.	.	.	.	.	.	.	.	.
16390	G	A	m.16390G>A	-	2	0	2	MT-DLOOP	.	.	.	.	.	intergenic_variant	MODIFIER	rs41378955	POAG - potential for association	+	.	0.0988	+	+	0.0356	0.0386	0.0417	0.0587	0.0625342	0.0318332	0.188414	0.06709	.	.	-4.6	-5.65311	0	.	.	.	.	.	.	.	.	.	.	.	.	.	.
16516	G	A	m.16516G>A	-	1	1	0	MT-DLOOP	.	.	.	.	.	intergenic_variant	MODIFIER	.	.	.	.	.	.	.	0.0001	0.0001	.	0.0003	0.000237773	0.000219539	0.001105	0.00042	.	.	3.67	5.493	1	.	.	.	.	.	.	.	.	.	.	.	.	.	.
16519	T	C	m.16519T>C	+	21	10	20	MT-DLOOP	.	.	.	.	.	intergenic_variant	MODIFIER	rs3937033	.	.	.	.	.	.	0.5752	0.6366	0.3409	0.6306	0.611266	0.55258	0.858054	0.583261	.	.	0.0676	-0.286465	0.015748	.	.	.	.	.	.	.	.	.	.	.	.	.	.
TOT	.	.	.	.	.	.	.	.	.	.	.	.	.	.	.	.	.	.	.	.	.	.	.	.	.	.	.	.	.	.	.	.	.	.	.	.	.	.	.	.	.	.	.	.	.	.	.	.	.
[truncated: 27 more columns]

## Sheet: Suppl_Table8
Sample	AF<0.1													AF=0.1-0.2													AF=0.2-0.3													AF=0.3-0.4
	A>C	A>G	A>T	C>A	C>G	C>T	G>A	G>C	G>T	T>A	T>C	T>G	ALL	A>C	A>G	A>T	C>A	C>G	C>T	G>A	G>C	G>T	T>A	T>C	T>G	ALL	A>C	A>G	A>T	C>A	C>G	C>T	G>A	G>C	G>T	T>A	T>C	T>G	ALL	A>C	A>G	A>T	C>A	C>G	C>T	G>A	G>C	G>T	T>A
Pol-1	0	0	0	0	0	0	1	0	0	0	0	0	1	0	0	0	0	0	0	0	0	0	0	0	0	0	0	0	0	0	0	0	0	0	0	0	0	0	0	0	0	0	0	0	0	0	0	0	0
Pol-2	0	0	0	0	0	0	1	0	0	0	0	0	1	0	0	0	0	0	0	0	0	0	0	0	0	0	0	0	0	0	0	0	0	0	0	0	0	0	0	0	0	0	0	0	0	0	0	0	0
Pol-3	0	0	0	0	0	4	3	0	0	0	0	0	7	0	0	0	0	0	0	0	0	0	0	0	0	0	0	0	0	0	0	0	0	0	0	0	0	0	0	0	0	0	0	0	0	0	0	0	0
Pol-4	0	0	0	0	0	1	1	0	0	0	0	0	2	0	0	0	0	0	0	0	0	0	0	0	0	0	0	0	0	0	0	0	0	0	0	0	0	0	0	0	0	0	0	0	0	0	0	0	0
Pol-5	0	0	0	0	0	4	8	0	0	0	0	0	12	0	0	0	0	0	2	0	0	0	0	0	0	2	0	0	0	0	0	0	0	0	0	0	1	0	1	0	0	0	0	0	0	0	0	0	0
Pol-6	0	0	0	0	0	1	3	0	0	0	0	0	4	0	0	0	0	0	0	1	0	0	0	0	0	1	0	0	0	0	0	0	0	0	0	0	0	0	0	0	0	0	0	0	0	0	0	0	0
Pol-7	0	0	0	0	0	1	4	0	0	0	0	0	5	0	0	0	0	0	0	0	0	0	0	0	0	0	0	0	0	0	0	0	0	0	0	0	0	0	0	0	0	0	0	0	0	0	0	0	0
Pol-9	0	0	0	0	0	2	1	0	0	0	0	0	3	0	0	0	0	0	0	0	0	0	0	0	0	0	0	0	0	0	0	0	0	0	0	0	0	0	0	0	0	0	0	0	0	0	0	0	0
Pol-10	0	0	0	0	0	2	1	0	0	0	0	0	3	0	0	0	0	0	0	0	0	0	0	0	0	0	0	0	0	0	0	0	0	0	0	0	0	0	0	0	0	0	0	0	0	0	0	0	0
Pol-11	0	0	0	0	0	1	2	0	0	0	0	0	3	0	0	0	0	0	0	0	0	0	0	0	0	0	0	0	0	0	0	0	0	0	0	0	0	0	0	0	0	0	0	0	0	0	0	0	0
Pol-12	0	0	0	0	0	1	1	0	0	0	0	0	2	0	0	0	0	0	2	1	0	0	0	0	0	3	0	0	0	0	0	0	0	0	0	0	0	0	0	0	0	0	0	0	0	0	0	0	0
Pol-13	0	0	0	0	0	1	0	0	0	0	0	0	1	0	0	0	0	0	0	0	0	0	0	0	0	0	0	0	0	0	0	0	0	0	0	0	0	0	0	0	0	0	0	0	0	0	0	0	0
Pol-14	0	0	0	0	0	1	0	0	0	0	0	0	1	0	0	0	0	0	0	0	0	0	0	0	0	0	0	0	0	0	0	0	0	0	0	0	0	0	0	0	0	0	0	0	0	0	0	0	0
Pol-15	0	0	0	0	0	1	1	0	0	0	0	0	2	0	0	0	0	0	0	0	0	0	0	0	0	0	0	0	0	0	0	0	0	0	0	0	0	0	0	0	0	0	0	0	0	0	0	0	0
Pol-16	0	0	0	0	0	5	2	0	0	0	0	0	7	0	0	0	0	0	1	1	0	0	0	1	0	3	0	0	0	0	0	0	0	0	0	0	0	0	0	0	0	0	0	0	0	0	0	0	0
Pol-17	0	0	0	0	0	0	1	0	0	0	0	0	1	0	0	0	0	0	0	0	0	0	0	0	0	0	0	0	0	0	0	0	0	0	0	0	0	0	0	0	0	0	0	0	0	0	0	0	0
Pol-18	0	0	0	0	0	0	0	0	0	0	0	0	0	0	0	0	0	0	0	0	0	0	0	0	0	0	0	0	0	0	0	0	0	0	0	0	0	0	0	0	0	0	0	0	0	0	0	0	0
Pol-21	0	0	0	0	0	0	0	0	0	0	0	0	0	0	0	0	0	0	0	8	0	0	0	0	0	8	0	0	0	0	0	0	0	0	0	0	0	0	0	0	0	0	0	0	0	0	0	0	0
Pol-22	0	0	0	0	0	0	0	0	0	0	0	0	0	0	0	0	0	0	0	0	0	0	0	0	0	0	0	0	0	0	0	0	0	0	0	0	0	0	0	0	0	0	0	0	0	0	0	0	0
Pol-23	0	0	0	0	0	0	0	0	0	0	0	0	0	0	0	0	0	0	0	0	0	0	0	0	0	0	0	0	0	0	0	0	0	0	0	0	0	0	0	0	0	0	0	0	0	0	0	0	0
Pol-24	0	0	0	0	0	1	5	0	0	0	0	0	6	0	0	0	0	0	0	0	0	0	0	0	0	0	0	0	0	0	0	0	0	0	0	0	0	0	0	0	0	0	0	0	0	0	0	0	0
Pol-25	0	0	0	0	0	3	4	0	0	0	0	0	7	0	0	0	0	0	0	1	0	0	0	0	0	1	0	0	0	0	0	0	0	0	0	0	0	0	0	0	0	0	0	0	0	0	0	0	0
Pol-26	0	0	0	0	0	0	1	0	0	0	0	0	1	0	0	0	0	0	0	0	0	0	0	0	0	0	0	0	0	0	0	0	0	0	0	0	0	0	0	0	0	0	0	0	0	0	0	0	0
Pol-27	0	0	0	0	0	0	21	0	0	0	0	0	21	0	0	0	0	0	1	0	0	0	0	0	0	1	0	0	0	0	0	0	0	0	0	0	0	0	0	0	0	0	0	0	0	0	0	0	0
Pol-28	0	0	0	0	0	1	1	0	0	0	0	0	2	0	0	0	0	0	0	0	0	0	0	0	0	0	0	0	0	0	0	0	0	0	0	0	0	0	0	0	0	0	0	0	0	0	0	0	0
Pol-29	0	0	0	0	0	0	0	0	0	0	0	0	0	0	0	0	0	0	0	0	0	0	0	0	0	0	0	0	0	0	0	0	0	0	0	0	0	0	0	0	0	0	0	0	0	0	0	0	0
Pol-30	0	0	0	0	0	1	4	0	0	0	0	0	5	0	0	0	0	0	0	0	0	0	0	0	0	0	0	0	0	0	0	1	1	0	0	0	1	0	3	0	0	0	0	0	2	0	0	0	0
												MEAN	3.59259												MEAN	0.703704												MEAN	0.148148
[truncated: 81 more columns]
